# Supplementary material for: Green photocatalytic N-debenzylations with molecular oxygen catalyzed by recyclable metal-free tubular carbon nitride
Source: Royal Society of Chemistry journal article supplement (doi:10.1039/d4cy00981a), 2024-11-07
Supplement: d4cy00981a1.pdf [file d4cy00981a1.pdf]

## Supplementary data

# Green Photocatalytic N-Debenzylations with Molecular Oxygen Catalyzed by Recyclable Metal- free Tubular Carbon Nitride

Yufeng Wu\*, Jiajie Kang, Jianing Li, Mingshu Bi, Qingwei Meng

School of Chemical Engineering, Dalian University of Technology, Dalian 116024, P.  
R. China

\*Corresponding author. E-mail address: [wuyufeng@dlut.edu.cn](mailto:wuyufeng@dlut.edu.cn)

Number of pages: 42

Number of tables: 2 [Tables S1 and S2]

Number of figures: 1 [Figure S1]

References: 10

---

## Contents

|                                                            |    |
|------------------------------------------------------------|----|
| <b>General Information</b> .....                           | 3  |
| <b>Experiments</b> .....                                   | 4  |
| <b>Preparation of catalysts</b> .....                      | 4  |
| <b>Photocatalytic N-debenzylation</b> .....                | 5  |
| <b>Catalyst recovery experiments</b> .....                 | 6  |
| <b>Electron paramagnetic resonance experiments</b> .....   | 7  |
| <b>DFT Calculations</b> .....                              | 7  |
| <b>Characterization for products</b> .....                 | 8  |
| <b>Cartesian coordinates of optimized structures</b> ..... | 23 |
| <b>Supplementary References</b> .....                      | 42 |

---

## General Information

All reagents were commercially available and used without further purification unless indicated otherwise. **1a** -**1ak** were prepared in laboratory. Silica gel column chromatography was performed with 200 – 300 mesh silica gels. TLC was performed using commercially prepared 100 - 400 mesh silica gel plates (GF254), and visualization was effected with UV light (254 nm).

<sup>1</sup>H spectra was recorded on Bruker Avance 400 MHz spectrophotometers (<sup>1</sup>H: 400 MHz, <sup>13</sup>C: 101 MHz). Chemical shifts ( $\delta$ ) for <sup>1</sup>H are given in ppm relative to TMS. The residual solvent signals were used as references for <sup>1</sup>H and <sup>13</sup>C NMR spectra and the chemical shifts converted to the TMS scale (CDCl<sub>3</sub>:  $\delta$ H = 7.26 ppm, DMSO-d<sub>6</sub>:  $\delta$ H = 2.50 ppm). The following abbreviations were used to explain the multiplicities: s = singlet, d = doublet, t = triplet, m = multiplet.

High performance liquid chromatography (HPLC) were carried out on an Agilent 1100. Gas chromatography mass spectrometry (GC-MS) were carried out on an Agilent 5975C Gas Chromatograph/Mass Selective. X-ray diffraction (XRD) patterns were recorded using a D8 Advance spectrometer, Cu K $\alpha$  radiation ( $\lambda$  = 0.154 nm), operating at 40 mA and 40 kV. FT-IR spectra were recorded using a Thermo Fisher 6700 spectrometer. SEM patterns were recorded using a NOVA Nano SEM 450 field emission transmission electron microscope. Specific surface areas of catalysts were carried out on Accelerated Surface Area Porosimetry System (Micromeritics Instrument Corporation). UV-vis diffuse reflectance spectra were recorded using a UV-550 UV spectrophotometer. EPR spectra was recorded using a Bruker E500 electron paramagnetic resonance spectrometer. PL spectra was recorded using a F-7100 fluorescence spectrometer. The light intensity was determined by a digital illuminometer (DL333205) made by Deli.

---

## Experiments

### Preparation of catalysts

**CN-M**: CN-M was prepared according to Xiao's literature<sup>1</sup>. Melamine (20 g, 159 mmol) in a ceramic crucible was heated to 550 °C at a rate of 2.3 °C min<sup>-1</sup> in a muffle furnace in an air atmosphere. The temperature was maintained at 550°C for 4 hours and CN-M was obtained after cooling to room temperature.

**CN-U**: CN-U was prepared according to Zhang's literature<sup>2</sup>. Urea (20 g, 333 mmol) in a ceramic crucible was heated to 550°C at a rate of 2.3 °C min<sup>-1</sup> in a muffle furnace in an air atmosphere. The temperature was maintained at 550°C for 4 hours and CN-U was obtained after cooling to room temperature.

**CN-T**: CN-T was prepared according to Wang's literature<sup>3</sup>. The mixture of melamine (1.0 g, 8 mmol) and urea (12.0 g, 200 mmol) was fully grounded with a mortar and then heated to 550°C at a rate of 2.3 °C min<sup>-1</sup> in a muffle furnace in an air atmosphere. The temperature was maintained at 550°C for 4 hours and CN-T was obtained after cooling to room temperature.

**CN-G**: CN-G was prepared according to Jun's literature<sup>4</sup>. Melamine (0.5 g, 4 mmol) and cyanuric acid (0.51 g, 4 mmol) were dissolved in 20 and 10 mL DMSO, respectively. After sonication for 30 min to dissolve them completely, the two solutions were mixed together to obtain a white precipitate. The precipitate was filtered, washed with water and ethanol, dried at 50 °C, and then calcined at 550 °C for 4 h with the heating rate of 2.3 °C min<sup>-1</sup>.

**CN-F**: CN-F was prepared according to Yu's literature<sup>5</sup>. Melamine (0.5 g, 4 mmol), and the mixture of cyanuric acid (0.51 g, 4 mmol) and oxalic acid (0.1 g, 1 mmol) were dissolved in 20 and 10 mL DMSO, respectively. After sonication for 30 min to dissolve them completely, the two solutions were mixed together to obtain a white precipitate. The precipitate was filtered, washed with water and ethanol, dried at 50 °C and then calcined at 550 °C for 4 h with the heating rate of 2.3 °C min<sup>-1</sup>.

**TiO<sub>2</sub>-F**: TiO<sub>2</sub>-F was prepared according to Yu's literature<sup>6</sup>. Potassium titanate oxalate (0.8 g, 2.2 mmol) and urea (2.4 g, 40 mmol) were added to the mixture of diethyleneglycol (60 ml) and deionized water (20 ml). The mixture was then sealed and stirred for 2 hours. After stirring, the dispersed mixture was loaded into a 100 ml a hydrothermal reactor and reacted at 180 °C for 12 hours. Finally, TiO<sub>2</sub>-F was obtained by centrifugation, washing with anhydrous ethanol and deionized water, and vacuum drying overnight at 70 °C.

**CN-M-Fe**: CN-M-Fe was prepared according to Ahmad's literature<sup>7</sup>. The catalyst was synthesized via incipient wetness impregnation method using FeCl<sub>3</sub> as Fe source and CN-M as support. FeCl<sub>3</sub> (20 mg, 0.12 mmol) and CN-M (1.0 g) were dissolved into 20 mL of deionized water. The mixture was stirred vigorously at room temperature for 2 h, followed by stirring and heating at 80 °C until the water almost completely

evaporates. The sample was dried at 50 °C and then calcined at 550 °C for 4 h with the heating rate of 2.3 °C min<sup>-1</sup>.

**CN-M-Ni:** CN-M-Ni was prepared according to Ahmad's literature<sup>7</sup>. The catalyst was synthesized via incipient wetness impregnation method using Ni(NO<sub>3</sub>)<sub>2</sub>·6H<sub>2</sub>O as Ni source and CN-M as support. Ni(NO<sub>3</sub>)<sub>2</sub>·6H<sub>2</sub>O (20 mg, 0.07 mmol) and CN-M (1.0 g) were dissolved into 20 mL of deionized water. The mixture was stirred vigorously at room temperature for 2 h, followed by stirring and heating at 80 °C until the water almost completely evaporates. The sample was dried at 50 °C and then calcined at 550 °C for 4 h with the heating rate of 2.3 °C min<sup>-1</sup>.

### General Photocatalytic N-debenzylation

The oven-dried schlenk tube (25 mL) equipped with a stirring bar, gas balloon and an inner light resource was charged with **1** (0.2 mmol, 1.0 equiv.), catalyst (5 mg), HCl (37%, 25 uL, 0.3 mmol) and acetone (2 mL). The light source (415 nm, 3W) was 4 centimeters higher than the liquid level, with an intensity of about 464 Lx. The reaction mixture in sealed tube was stirred at 25 °C for about 15 minutes and then reacted under light for 1 – 72 h. The yield was obtained via column separation, high performance liquid chromatography (HPLC) or Gas Chromatography-Mass Spectrometry (GC-MS).

**Table S1.** The light intensity for different light resources.

| Light resource | Light intensity (Lx) |
|----------------|----------------------|
| 660nm, 3W      | 1738                 |
| 620 nm, 3W     | 2156                 |
| 590 nm, 3W     | 2991                 |
| 550 nm, 3W     | 3970                 |
| 450 nm, 3W     | 3186                 |
| 415 nm, 3W     | 8192                 |
| 385 nm, 3W     | 7400                 |
| 395 nm, 30W    | 50500                |
| 254nm, 1W      | --                   |

## Catalyst recovery experiments

The 1th cycle: The oven-dried quartz schlenk tube (50 mL) containing a stirring bar and a gas balloon was charged with **1a** (257.0 mg, 1.0 mmol, 1.0 equiv), CN-T (25.0 mg), HCl (125 $\mu$ l, 1.5 mmol, 1.5 equiv), and acetone (10 mL). the gas balloon was filled with a mixture of air and N<sub>2</sub> (V<sub>air</sub>:V<sub>N<sub>2</sub></sub> = 1:2). 20 W LEDs (wavelength: 395 nm) was used to illuminate the reaction solution from the side after pre-stirring for 15 min. the reaction temperature was 25 °C. The reaction time for each cycle was shown in Table S1. After reaction, the mixture was centrifuged to obtained recycled CN-T and reaction liquid. The reaction liquid was analyzed by HPLC. The recycled CN-T was further washed with acetone and dried at 50 °C in vacuum for 4 h.

The 2 – 4th cycles: the recycled CN-T and a small amount of fresh CN-T (if the catalyst loss is significant) is used in the next cycle. The recycled CN-T for 3 – 6th cycles are dried at 150 °C for 2 h. More detailed information is shown in Table S2.

**Table S2.** The results for the recycled experiments.

| Cycle | Fresh CN-T (mg) | Recycled CN-T (mg) | Recovery rate (%) | Drying Temperature (°C) | Reaction time (°C) | Yield (%) |
|-------|-----------------|--------------------|-------------------|-------------------------|--------------------|-----------|
| 1     | 25              | 24.8               | 99                | 50                      | 5                  | 85        |
| 2     | 0               | 23.6               | 95                | 50                      | 5                  | 86        |
| 3     | 0               | 22                 | 93                | 150                     | 5.5                | 88        |
| 4     | 3               | 24.5               | 98                | 150                     | 6                  | 89        |
| 5     | 0               | 23.8               | 97                | 150                     | 6                  | 90        |
| 6     | 1.2             | 24.2               | 97                | 150                     | 6                  | 89        |

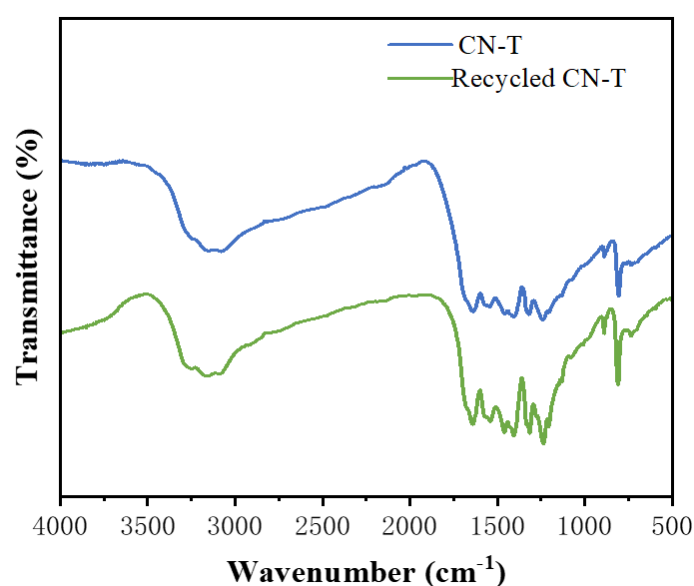

Figure S1. Fourier transform infrared (FT-IR) pattern for the recycled CN-T.

---

## Electron paramagnetic resonance experiments

Electron paramagnetic resonance experiments were measured on Bruker E500 electron paramagnetic resonance spectrometer. A mixture of 1a (0.2 mmol), CN-T (5 mg), TEMP (2,2,6,6-tetramethyl-piperidine) (0.4mmol) or DMPO (5,5-dimethyl-1-pyrroline-N-oxide, 0.2 mmol) (0.4mmol) in acetone (2 mL) was stirred. 20  $\mu$ L of the mixture was quickly taken out into a small tube and analyzed by EPR. Afterwards, the mixture irradiated by a 100 W Xenon lamp for 2 min. Signal comparison reveals that molecular oxygen is activated to generate singlet oxygen and superoxide radicals.

## DFT Calculations

All calculations were carried out with Gaussian 16<sup>8</sup>. Geometry optimization and vibrational frequencies for all structures of reductants, products, transition states and intermediates were performed using M06-2x hybrid meta functiona<sup>9, 10</sup> with a basis set of 6-311+G(d,p) for all atoms. Acetone was used as solvent and the self-consistent reaction field (SCRF) polarizable continuum model (PCM) model was applied to calculate the solvation energy corrections. Only one imaginary frequency corresponding to the reaction coordinates was found for the transition states. The more accurate electron energies were obtained from the frequency calculations at a level of M06-2x/def2tzvp.

## Characterization for products

**Carbazole (2a - 2r):** White solid, 13.4 ~ 31.1 mg;  $^1\text{H NMR}$  (400 MHz,  $\text{DMSO-}d_6$ )  $\delta$  11.26 (s, 1H), 8.12-8.10 (d,  $J = 7.8$  Hz, 2H), 7.51-7.39 (d,  $J = 8.1$  Hz, 2H), 7.41-7.39 (t,  $J = 7.0$  Hz, 2H), 7.20 - 7.12 (m, 2H).  $^{13}\text{C NMR}$  (101 MHz,  $\text{DMSO-}d_6$ )  $\delta$  140.18, 125.96, 122.86, 120.61, 118.94, 111.39.

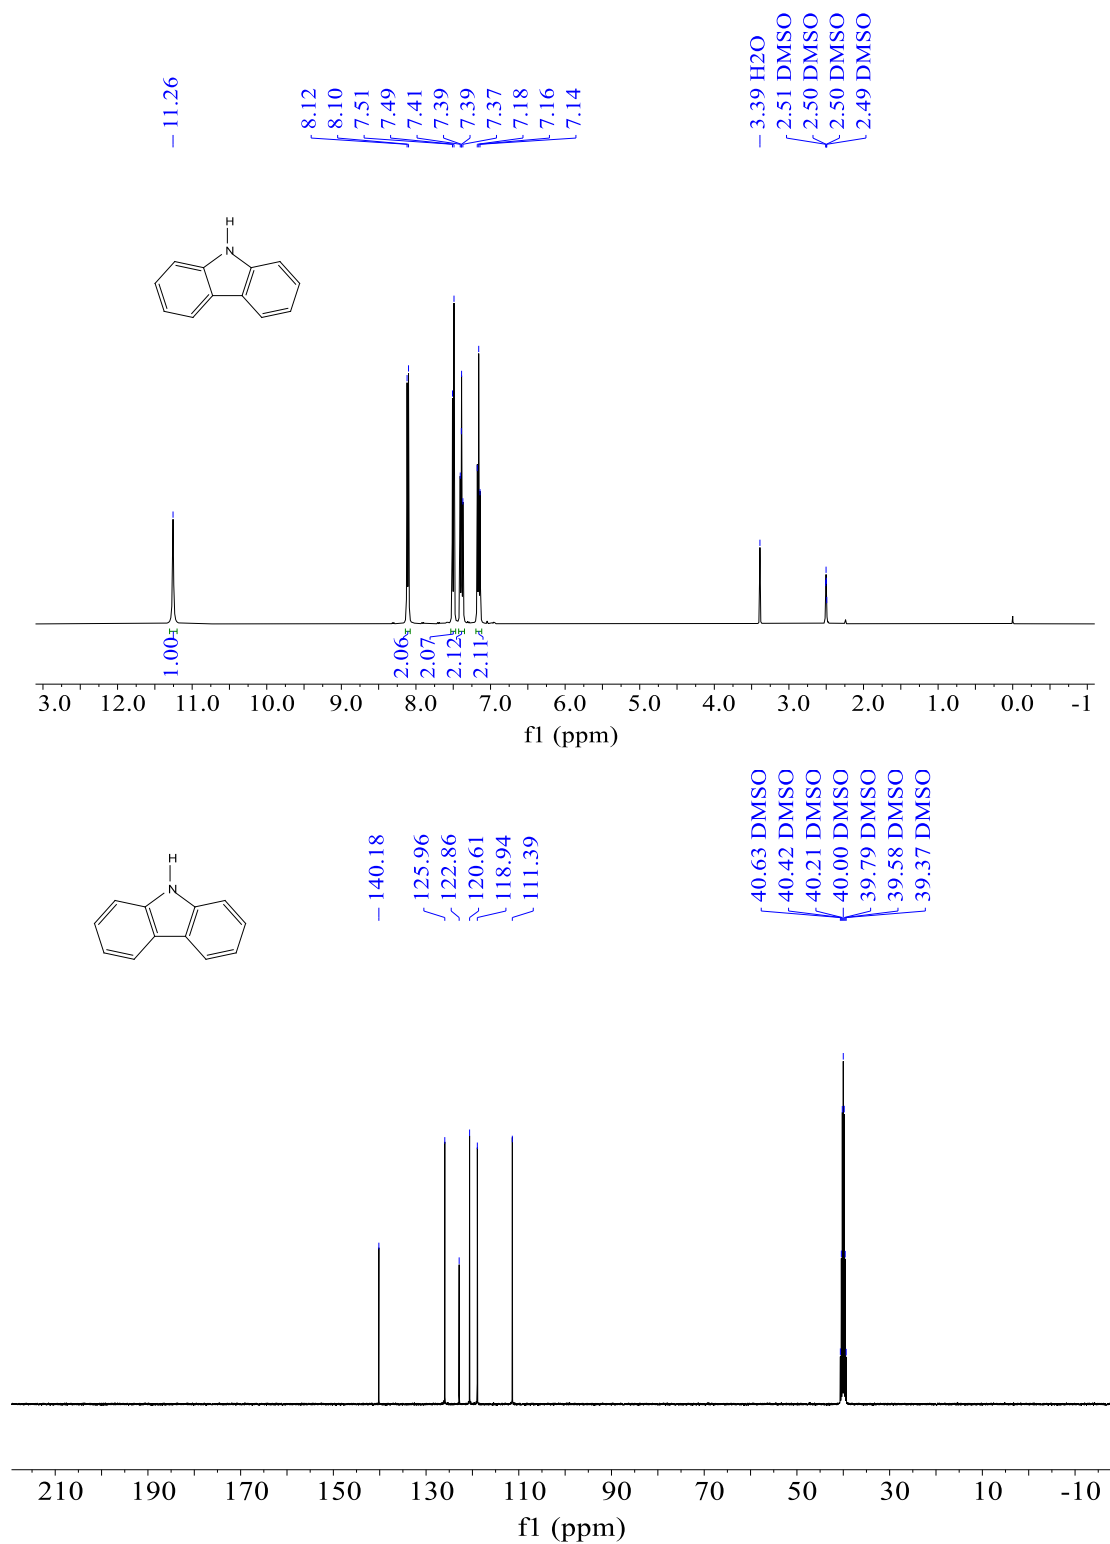



**2-Chloro-9H-carbazole (2t):** White solid, 32.6 mg;  $^1\text{H NMR}$  (400 MHz,  $\text{DMSO-}d_6$ )  $\delta$  11.41 (s, 1H), 8.12 (d,  $J = 8.2$  Hz, 2H), 7.56 – 7.48 (m, 2H), 7.46 – 7.37 (m, 1H), 7.23 – 7.14 (m, 2H).  $^{13}\text{C NMR}$  (101 MHz,  $\text{THF-}d_8$ )  $\delta$  126.43, 122.01, 120.79, 119.55, 119.14, 111.68, 111.07.

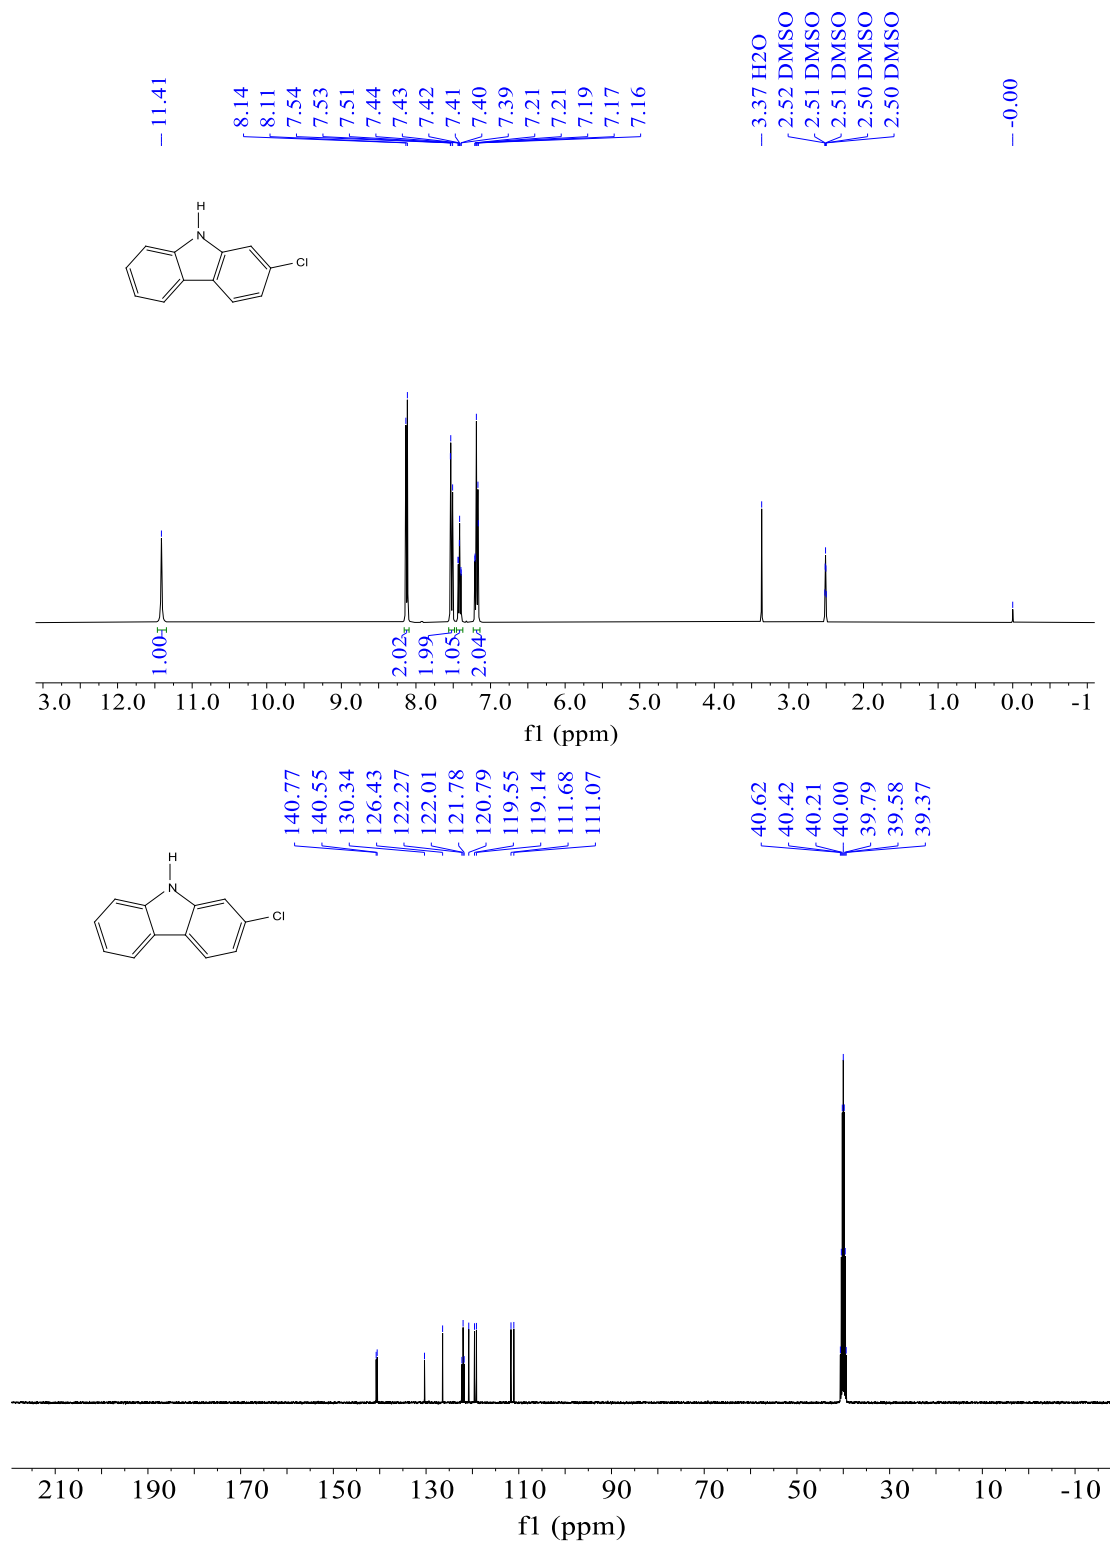

**3-Chloro-9H-carbazole (2u):** White solid, 35.0 mg;  $^1\text{H NMR}$  (400 MHz,  $\text{DMSO-}d_6$ )  $\delta$  11.45 (s, 1H), 8.23-8.21 (d,  $J = 2.1$  Hz, 1H), 8.18-8.16 (d,  $J = 7.8$  Hz, 1H), 7.52-7.51 (d,  $J = 8.6$  Hz, 2H), 7.47 – 7.35 (m, 2H), 7.20-7.16 (t,  $J = 6.9$  Hz, 1H).  $^{13}\text{C NMR}$  (101 MHz,  $\text{DMSO-}d_6$ )  $\delta$  140.79, 138.59, 126.77, 125.73, 124.20, 123.28, 122.04, 121.16, 120.24, 119.33, 112.86, 111.69.

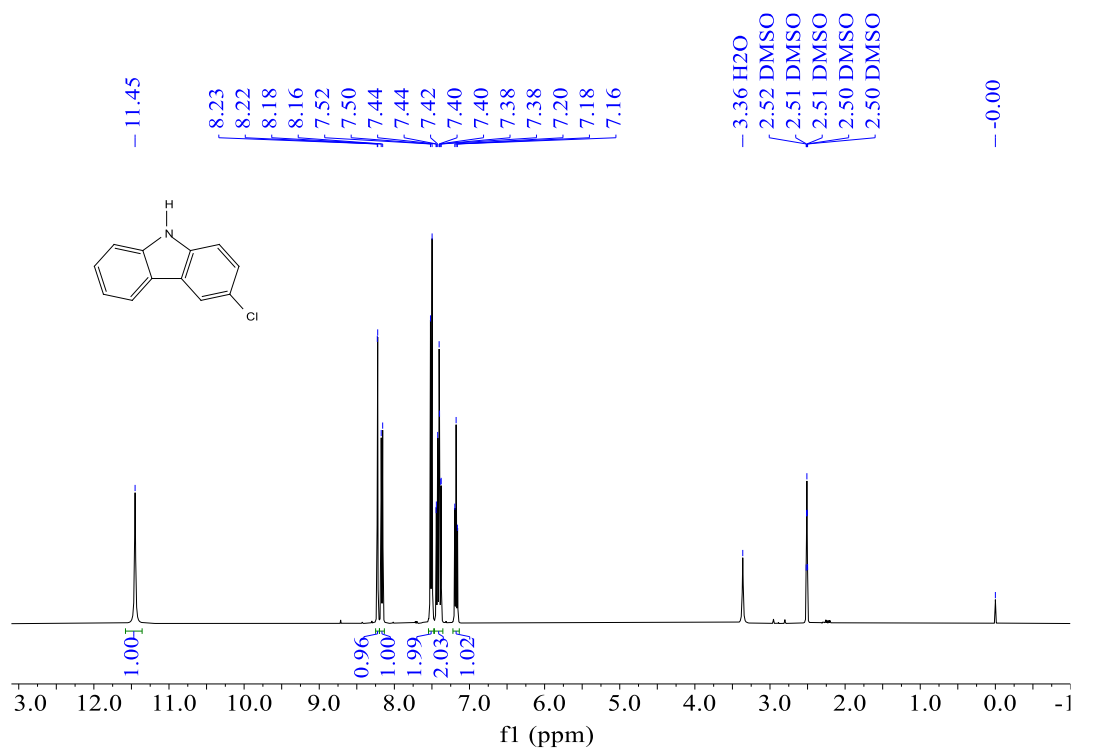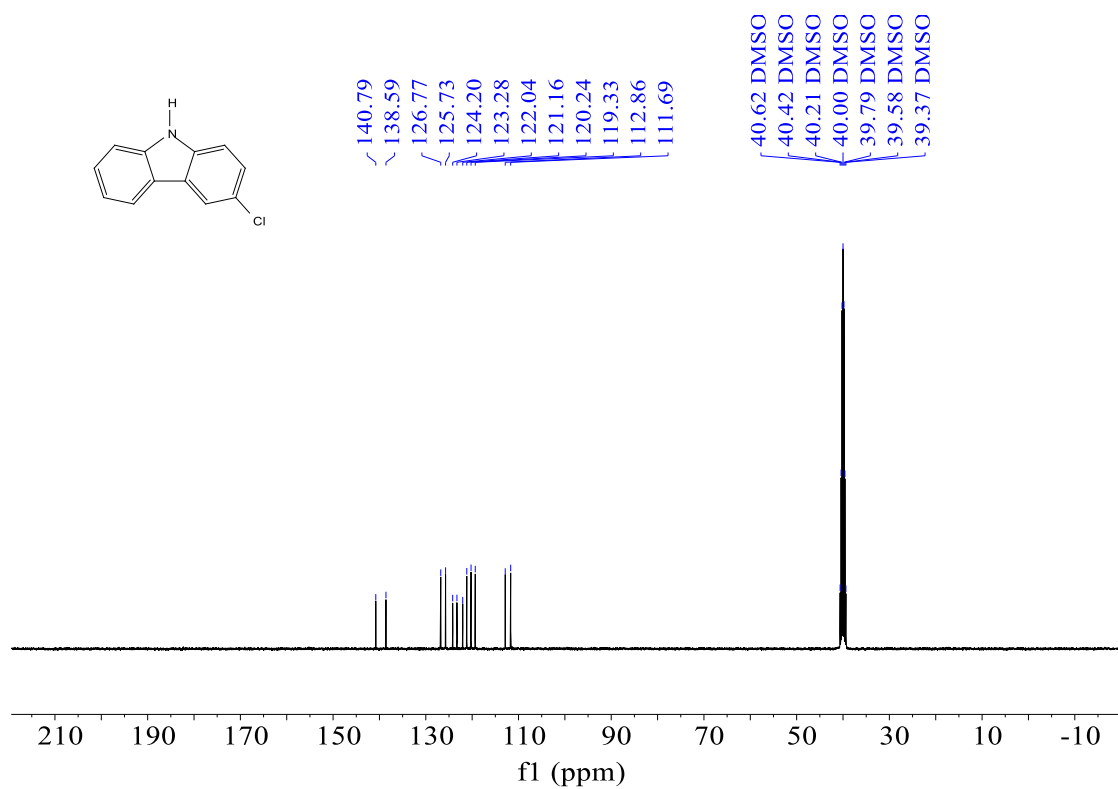

**2-Bromo-9H-carbazole (2v):** White solid, 39.2 mg;  $^1\text{H NMR}$  (400 MHz,  $\text{DMSO-}d_6$ )  $\delta$  11.41 (s, 1H), 8.13 (d,  $J = 7.8$  Hz, 1H), 8.07 (d,  $J = 8.3$  Hz, 1H), 7.69 (d,  $J = 1.7$  Hz, 1H), 7.53 (d,  $J = 8.2$  Hz, 1H), 7.43 (m,  $J = 8.2, 7.6, 1.2$  Hz, 1H), 7.30 (m,  $J = 8.3, 1.8$  Hz, 1H), 7.24 – 7.14 (m, 1H).  $^{13}\text{C NMR}$  (101 MHz,  $\text{DMSO-}d_6$ )  $\delta$  141.11, 140.38, 126.56, 122.36, 122.28, 122.07, 121.78, 120.82, 119.56, 118.61, 114.00, 111.70.

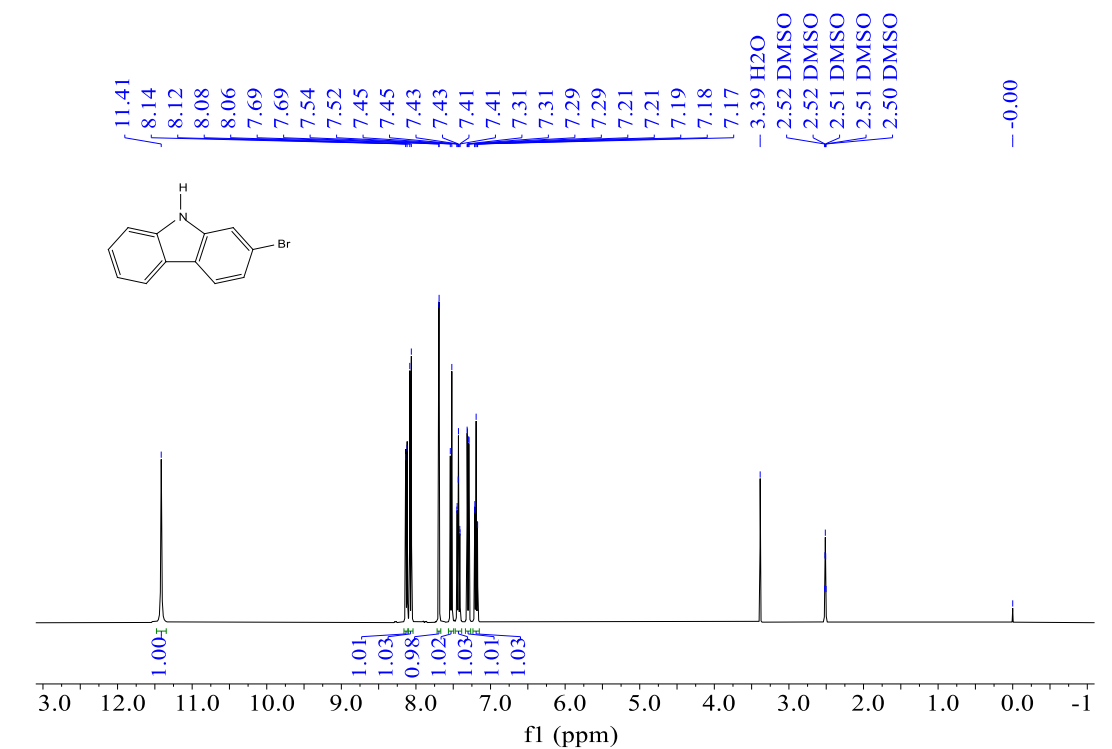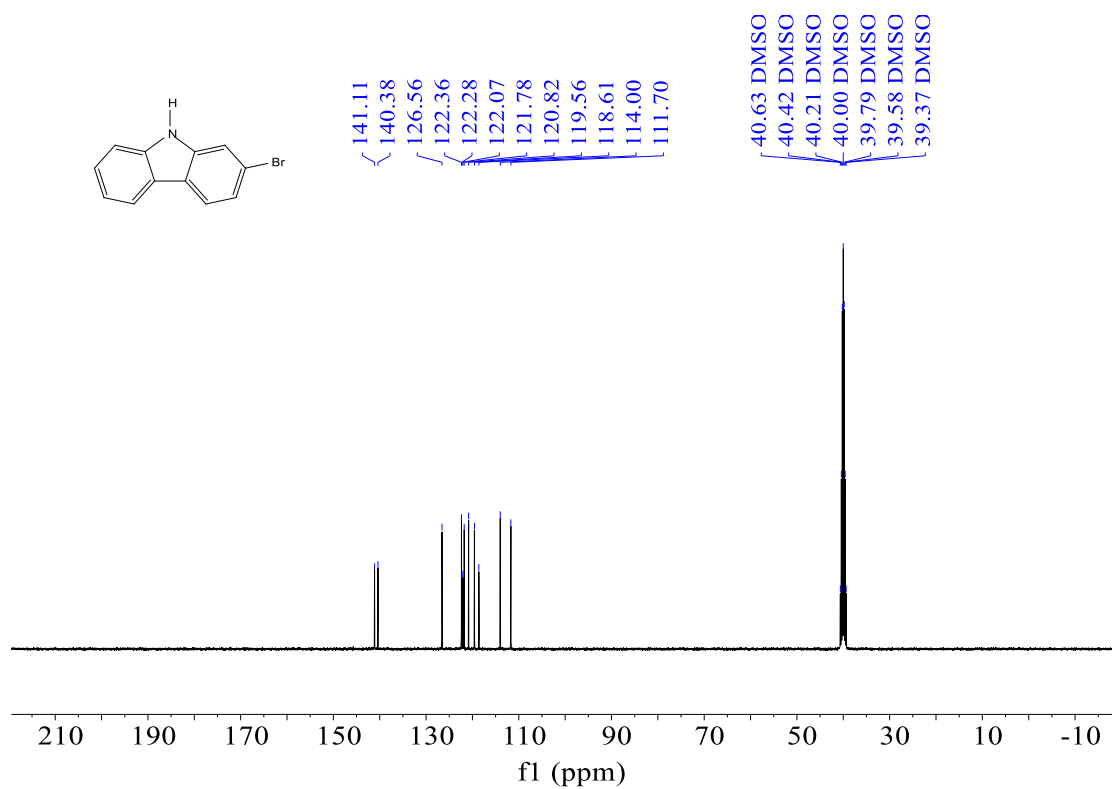

**3-Bromo-9H-carbazole (2w, 2x):** White solid, 38.2 ~ 44.1 mg;  $^1\text{H NMR}$  (400 MHz,  $\text{DMSO-}d_6$ )  $\delta$  11.44 (s, 1H), 8.37 (d,  $J = 1.9$  Hz, 1H), 8.18 (d,  $J = 7.9$  Hz, 1H), 7.56 – 7.49 (m, 2H), 7.49 – 7.39 (m, 2H), 7.23 – 7.14 (m, 1H).  $^{13}\text{C NMR}$  (101 MHz,  $\text{DMSO-}d_6$ )  $\delta$  140.60, 138.86, 128.33, 126.81, 124.87, 123.20, 121.92, 121.16, 119.41, 113.36, 111.67, 111.02.

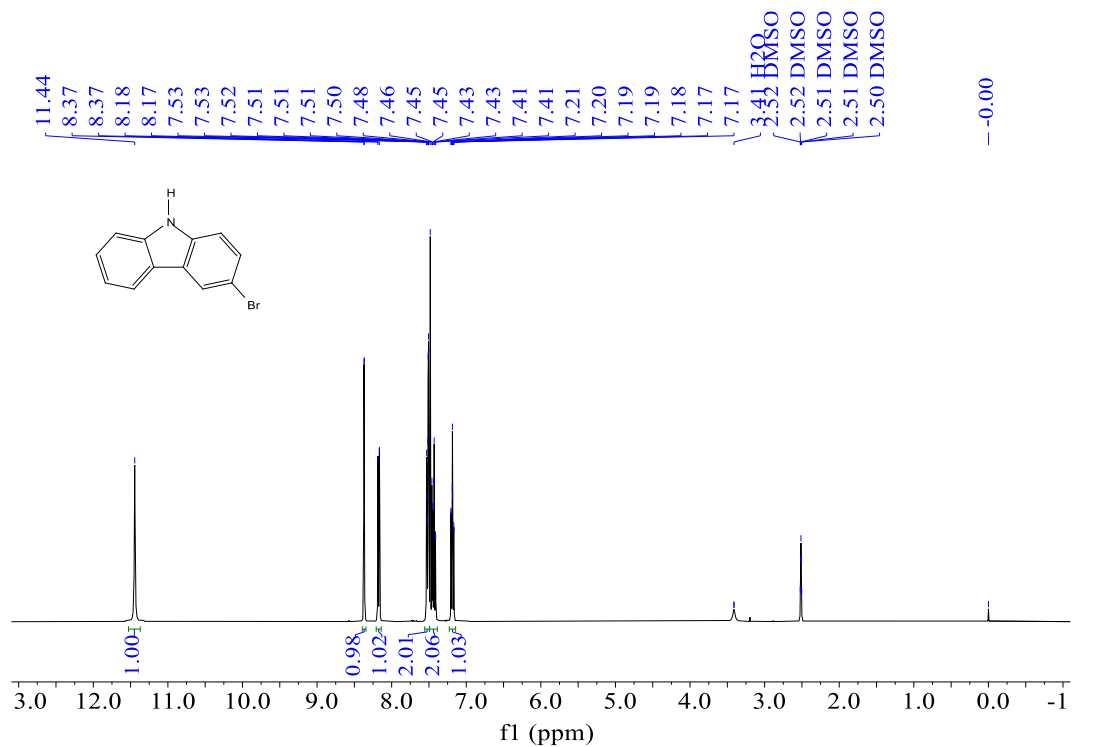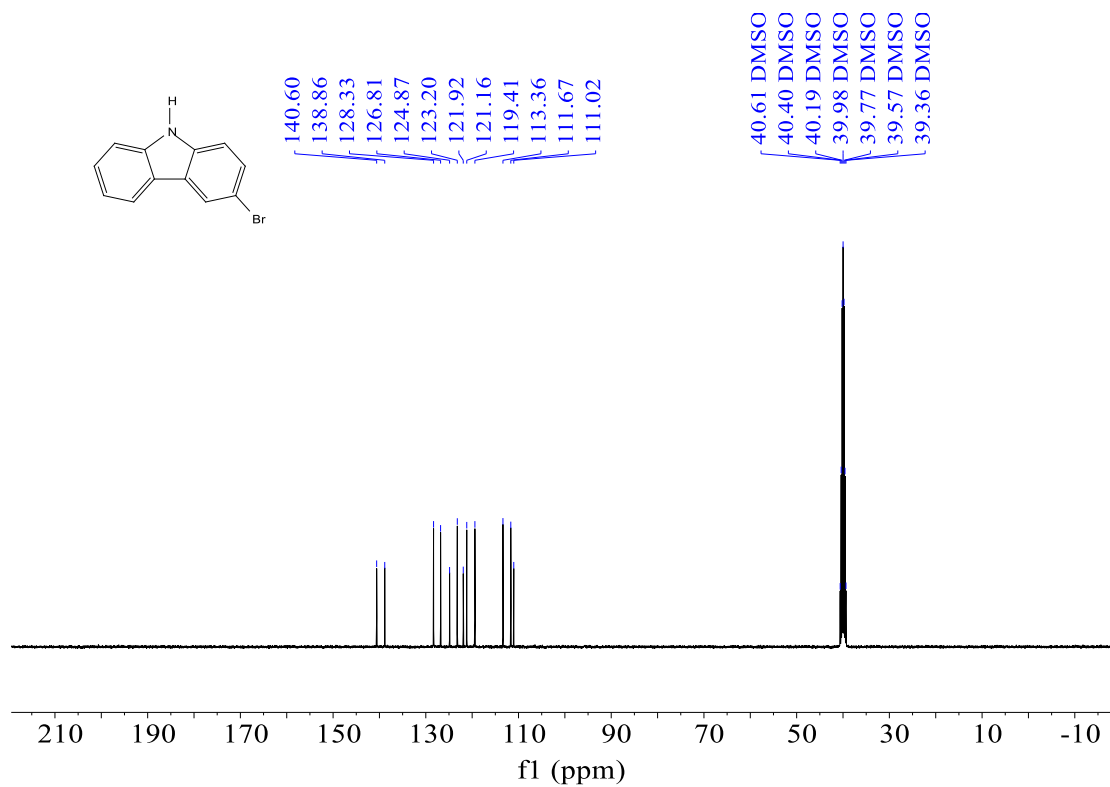

**3-Iodo-9H-carbazole (2y):** White solid, 45.7 mg;  $^1\text{H NMR}$  (400 MHz,  $\text{DMSO-}d_6$ )  $\delta$  11.42 (s, 1H), 8.52 (d,  $J = 1.7$  Hz, 1H), 8.16 (d,  $J = 8.8$  Hz, 1H), 7.68 – 7.61 (m, 1H), 7.51 (d,  $J = 8.1$  Hz, 1H), 7.46 – 7.39 (m, 1H), 7.36 (d,  $J = 8.5$  Hz, 1H), 7.22 – 7.13 (m, 1H).  $^{13}\text{C NMR}$  (101 MHz,  $\text{DMSO-}d_6$ )  $\delta$  140.23, 139.27, 133.83, 129.16, 126.74, 125.66, 121.66, 121.10, 119.44, 118.93, 113.89, 111.58, 81.81.

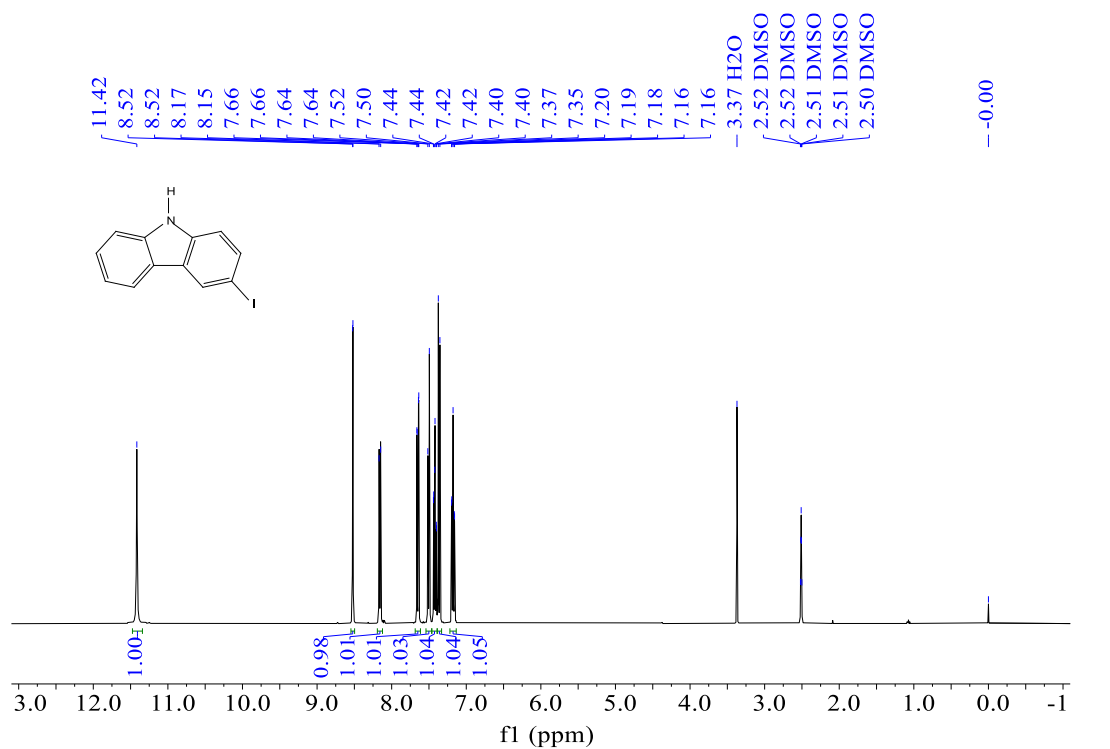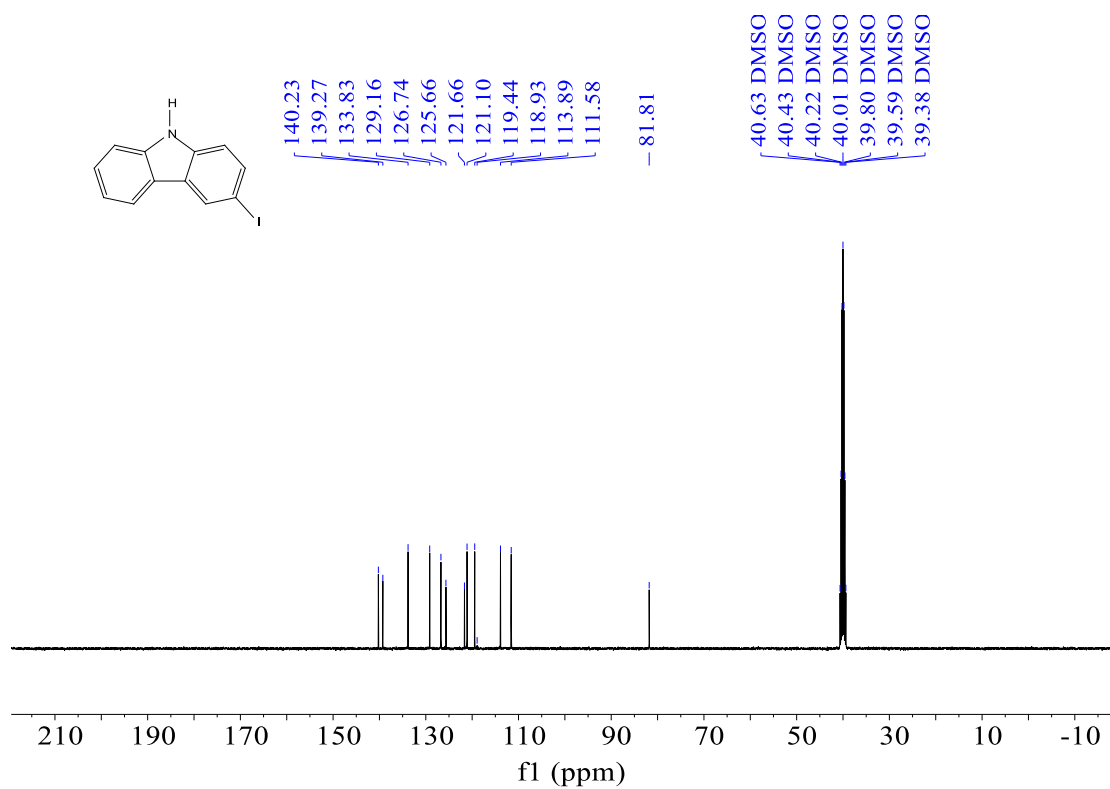

**4-Bromo-9H-carbazole (2z):** White solid, 35.3 mg;  $^1\text{H NMR}$  (400 MHz,  $\text{DMSO-}d_6$ )  $\delta$  11.67 (s, 1H), 8.60 (d,  $J = 8.1$  Hz, 1H), 7.61 – 7.54 (m, 2H), 7.54 – 7.47 (m, 1H), 7.39 (m,  $J = 7.8, 1.1$  Hz, 1H), 7.33 (t,  $J = 7.8$  Hz, 1H), 7.29 – 7.23 (m, 1H).  $^{13}\text{C NMR}$  (101 MHz,  $\text{DMSO-}d_6$ )  $\delta$  141.46, 140.43, 126.95, 126.79, 122.77, 122.13, 121.16, 119.19, 115.91, 111.64, 110.83.

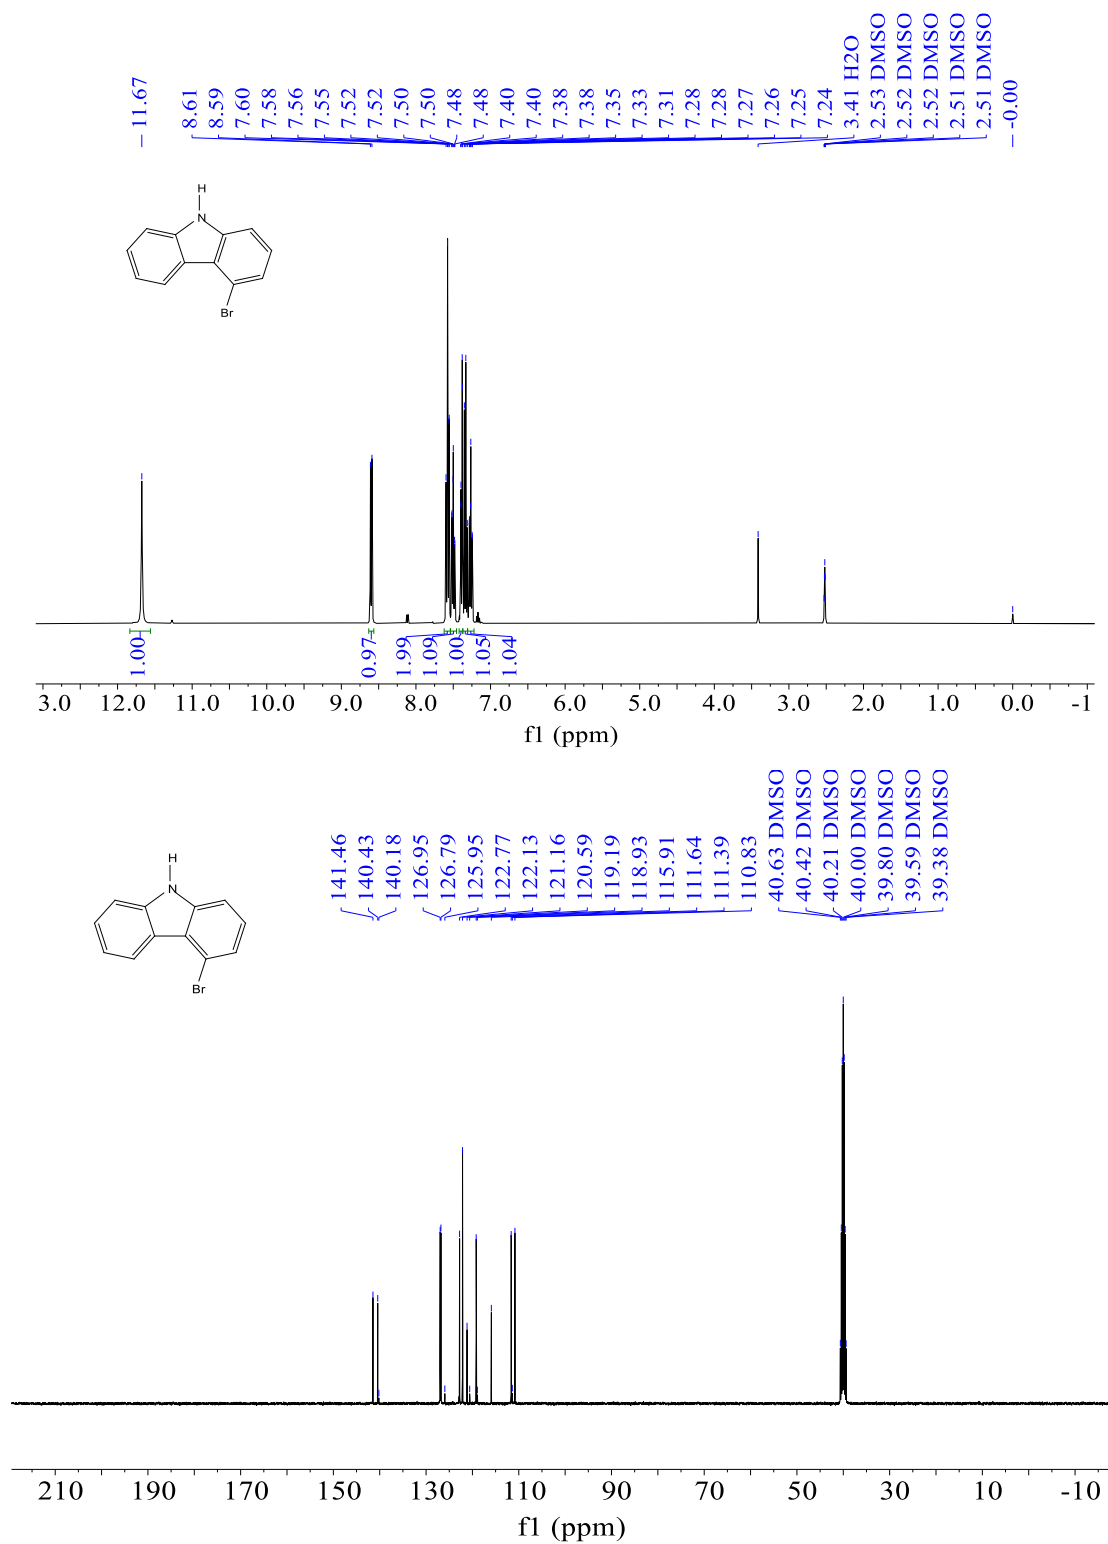

**2-Methoxy-9H-carbazole (2aa):** White solid, 31.0 mg;  $^1\text{H NMR}$  (400 MHz,  $\text{DMSO-}d_6$ )  $\delta$  11.10 (s, 1H), 8.01 – 7.92 (m, 2H), 7.42 (d,  $J = 8.0$  Hz, 1H), 7.33 – 7.24 (m, 1H), 7.15 – 7.06 (m, 1H), 6.97 (d,  $J = 2.3$  Hz, 1H), 6.81 – 6.73 (m,  $J = 8.5, 2.3$  Hz, 1H), 3.84 (s, 3H).  $^{13}\text{C NMR}$  (101 MHz,  $\text{DMSO-}d_6$ )  $\delta$  158.96, 141.56, 140.18, 124.57, 123.13, 121.35, 119.70, 119.00, 116.64, 111.07, 108.15, 94.91, 55.71.

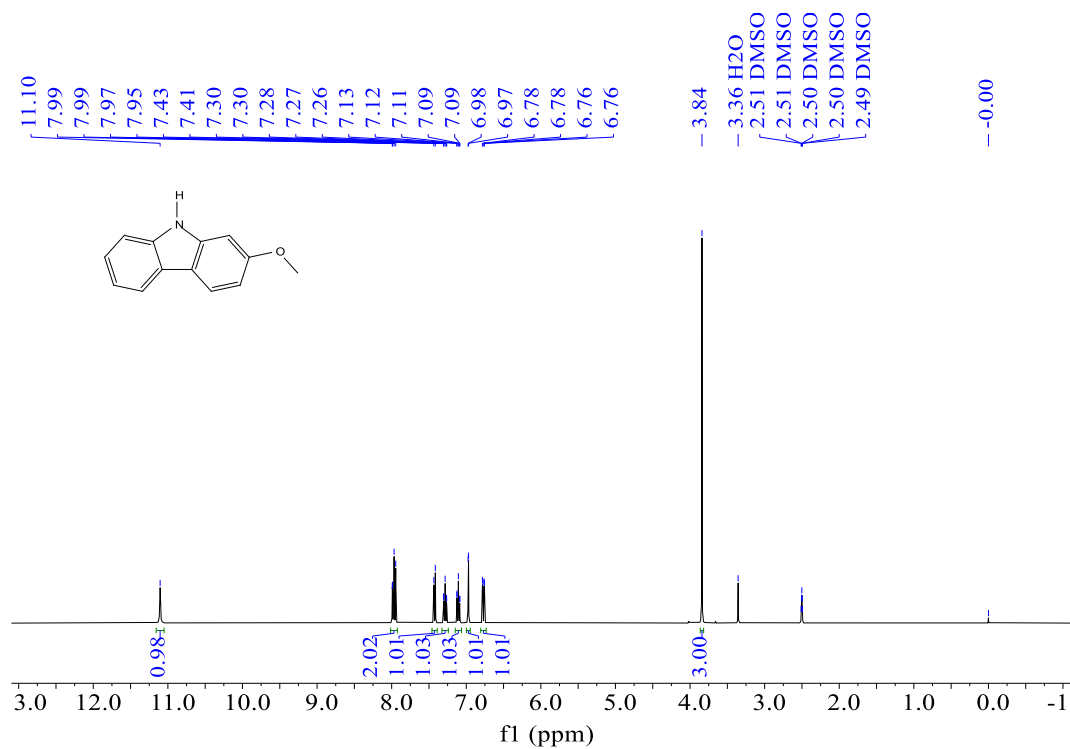

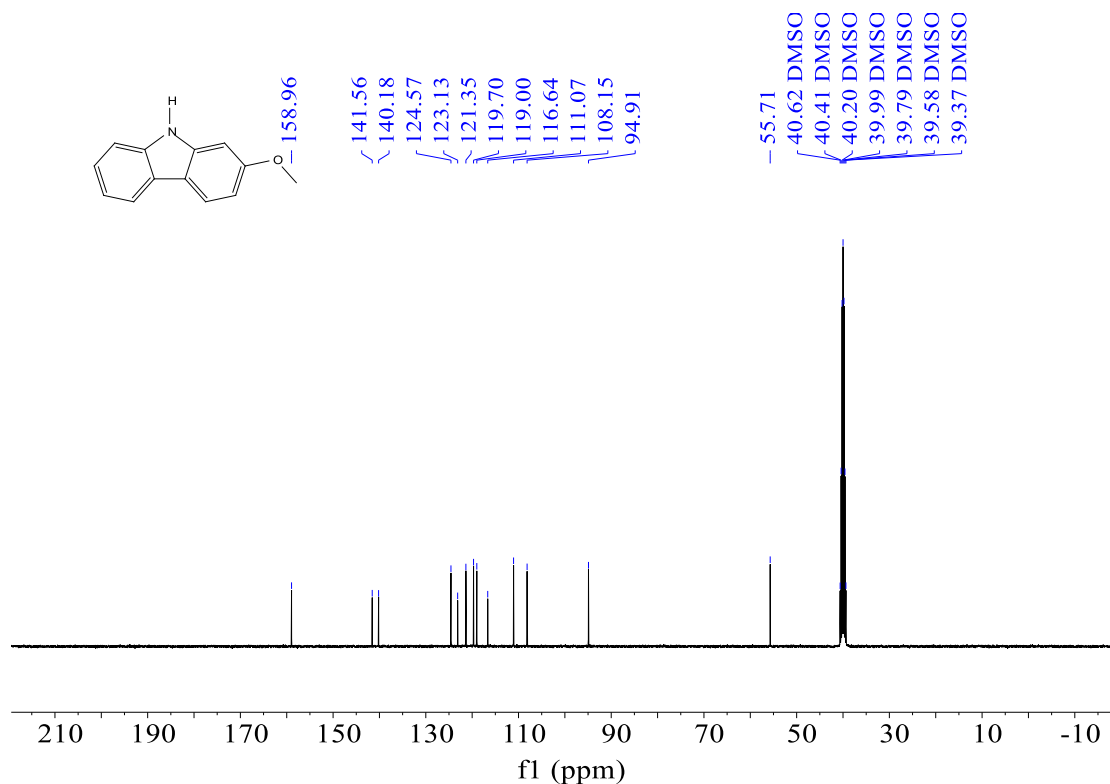

**3-Phenyl-9H-carbazole (2ab):** White solid, 38.4 mg;  $^1\text{H NMR}$  (400 MHz, DMSO- $d_6$ )  $\delta$  11.35 (s, 1H), 8.46 (d,  $J = 1.8$  Hz, 1H), 8.23 (d,  $J = 7.4$  Hz, 1H), 7.81 – 7.68 (m, 3H), 7.61 – 7.37 (m, 5H), 7.33 (t,  $J = 7.3$  Hz, 1H), 7.23 – 7.15 (m, 1H).  $^{13}\text{C NMR}$  (101 MHz, DMSO- $d_6$ )  $\delta$  141.82, 140.73, 139.77, 131.46, 129.33, 127.15, 126.82, 126.22, 125.11, 123.58, 123.10, 120.93, 119.13, 118.77, 111.78, 111.56.

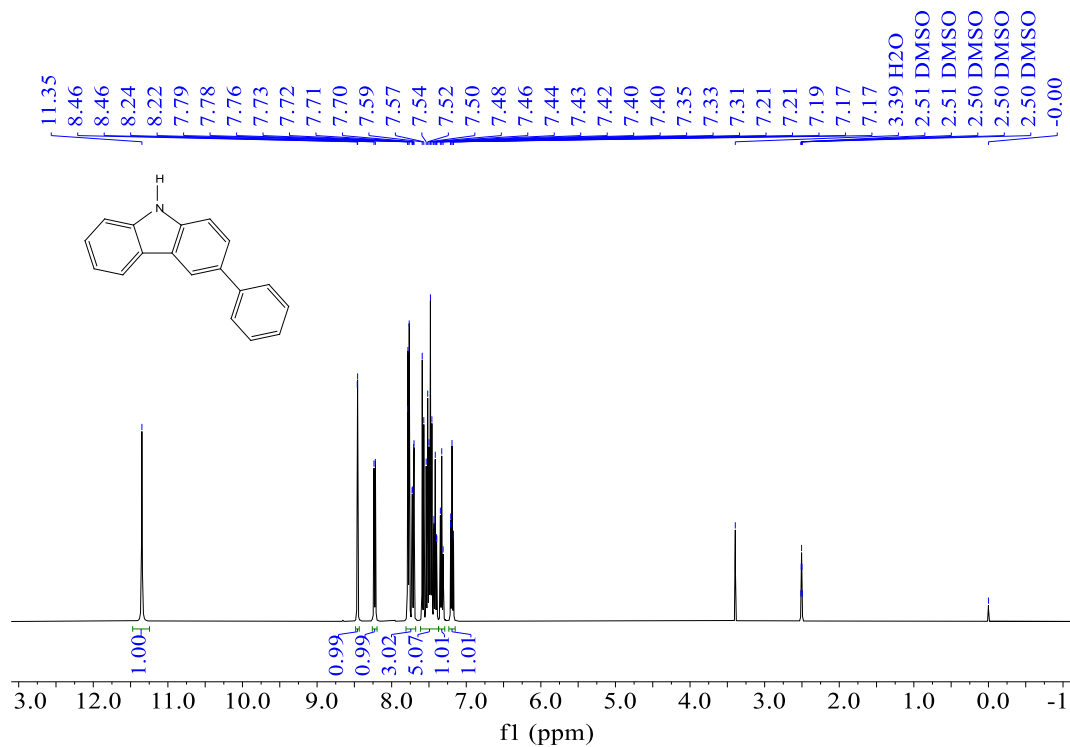



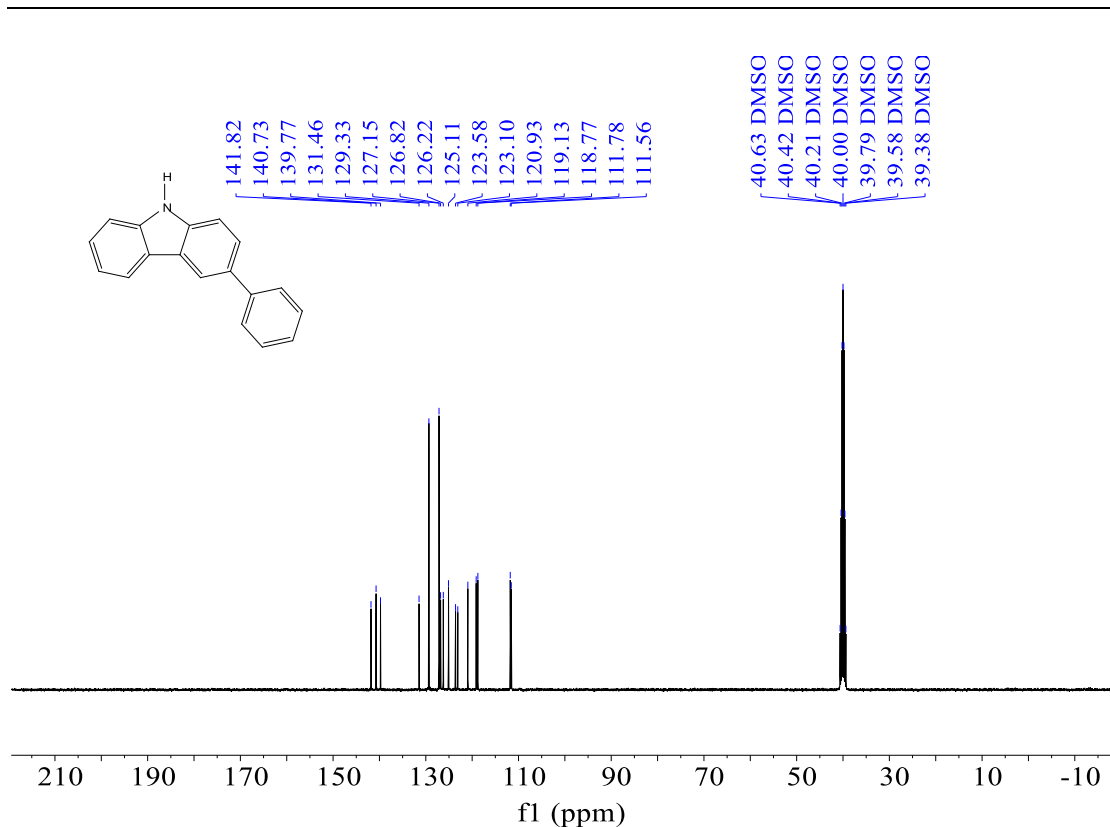

**3,6-Diphenyl-9H-carbazole (2ac):** White solid, 53.0 mg;  $^1\text{H}$  NMR (400 MHz,  $\text{DMSO-}d_6$ )  $\delta$  11.40 (s, 1H), 8.60 (d,  $J = 1.8$  Hz, 2H), 7.84 – 7.77 (m, 4H), 7.77 – 7.71 (m, 2H), 7.59 (d,  $J = 8.4$  Hz, 2H), 7.49 (t,  $J = 7.7$  Hz, 4H), 7.38 – 7.29 (m, 2H).  $^{13}\text{C}$  NMR (101 MHz,  $\text{DMSO-}d_6$ )  $\delta$  141.73, 140.27, 131.52, 129.33, 127.09, 126.86, 125.24, 123.83, 119.14, 111.92.

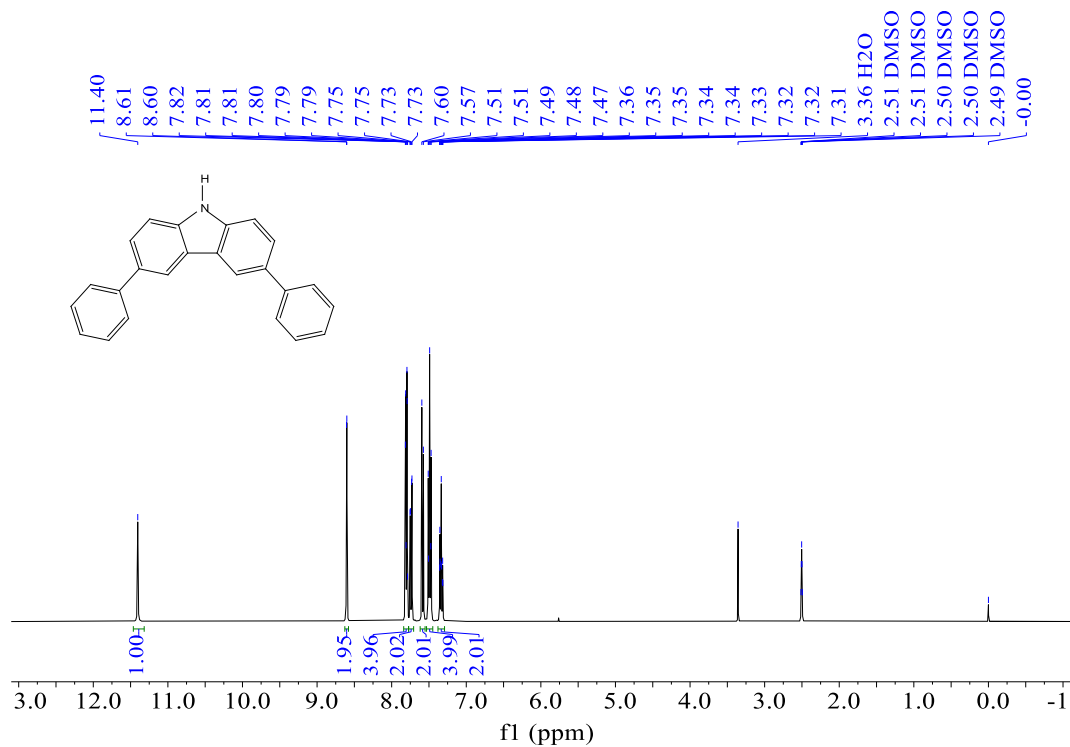

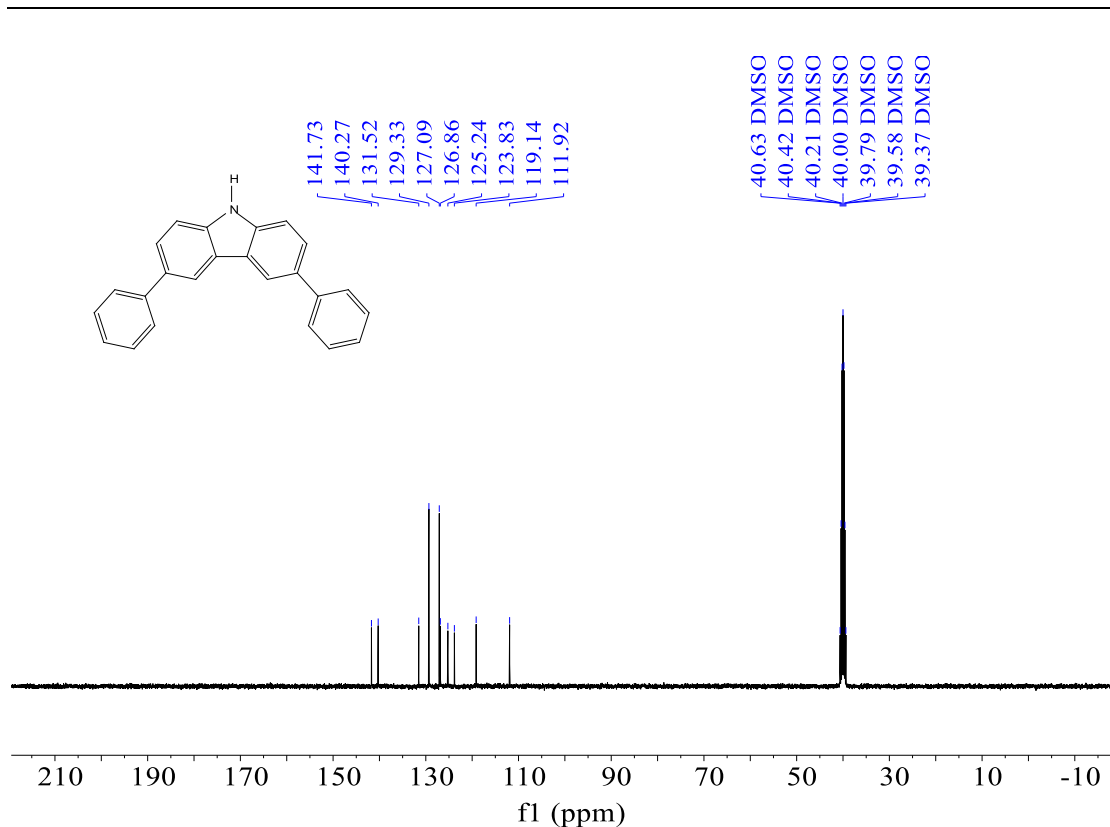

**3,6-Di-tert-butylcarbazole (1ad, 1ae):** White solid, 47.4 mg;  $^1\text{H}$  NMR (400 MHz, Chloroform-*d*)  $\delta$  8.10 – 8.05 (m, 2H), 7.48 – 7.41 (m,  $J = 8.5, 1.9$  Hz, 2H), 7.31 – 7.24 (m, 2H), 1.45 (s, 18H).  $^{13}\text{C}$  NMR (101 MHz, Chloroform-*d*)  $\delta$  142.26, 138.05, 123.56, 123.34, 116.21, 110.05, 34.74, 32.09.

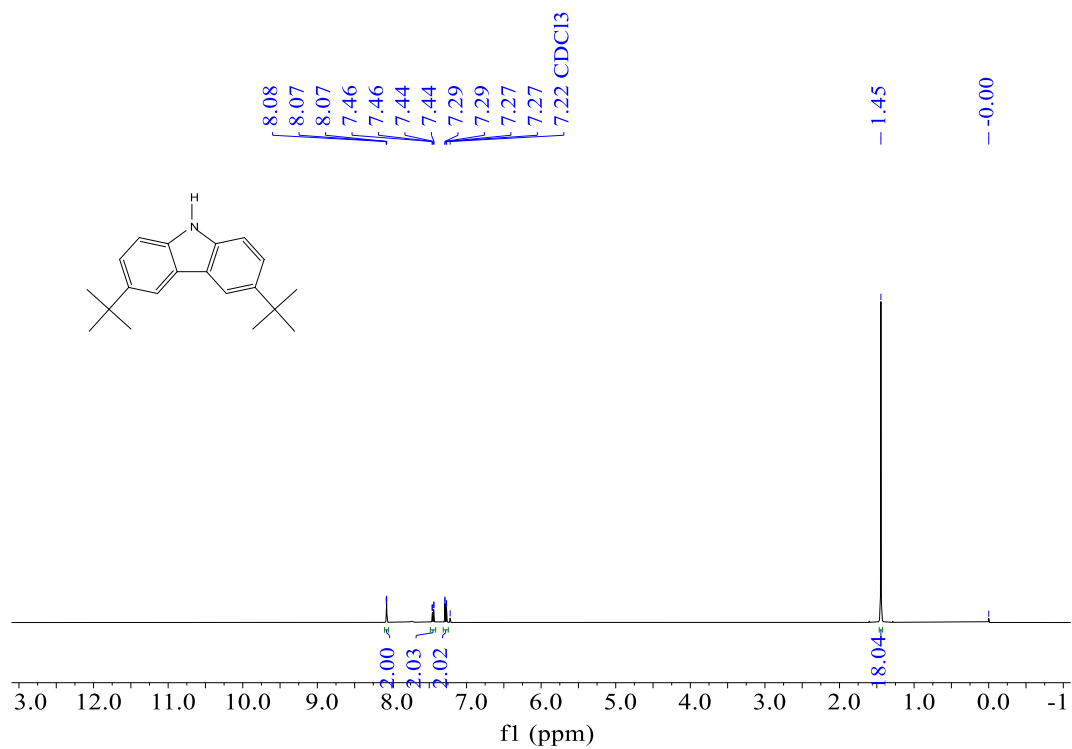

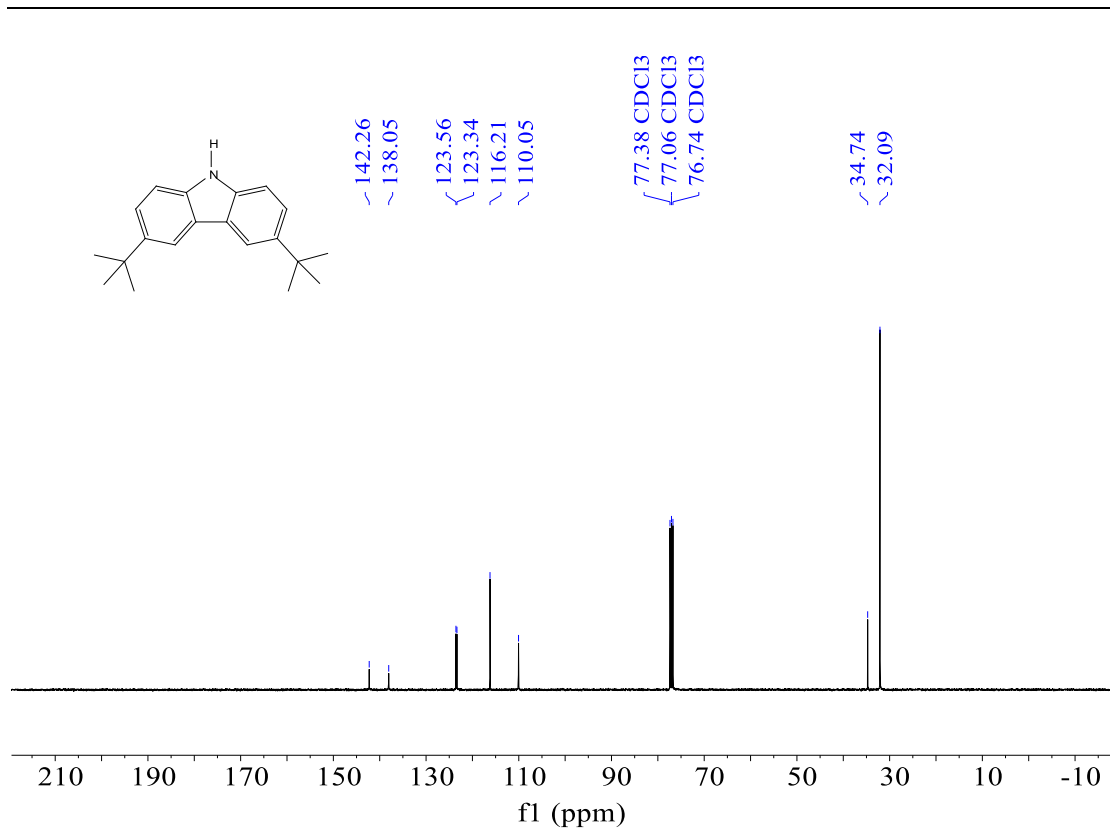

**9(10H)-Acridinone (2af):** Green solid, 33.2 mg;  $^1\text{H}$  NMR (400 MHz, DMSO-*d*<sub>6</sub>)  $\delta$  11.77 (s, 1H), 8.25 (d, *J* = 6.6 Hz, 2H), 7.77 – 7.70 (m, 2H), 7.56 (d, *J* = 8.3 Hz, 2H), 7.27 (t, *J* = 7.5 Hz, 2H).  $^{13}\text{C}$  NMR (101 MHz, DMSO-*d*<sub>6</sub>)  $\delta$  177.24, 141.37, 133.92, 126.48, 121.47, 120.96, 117.81.

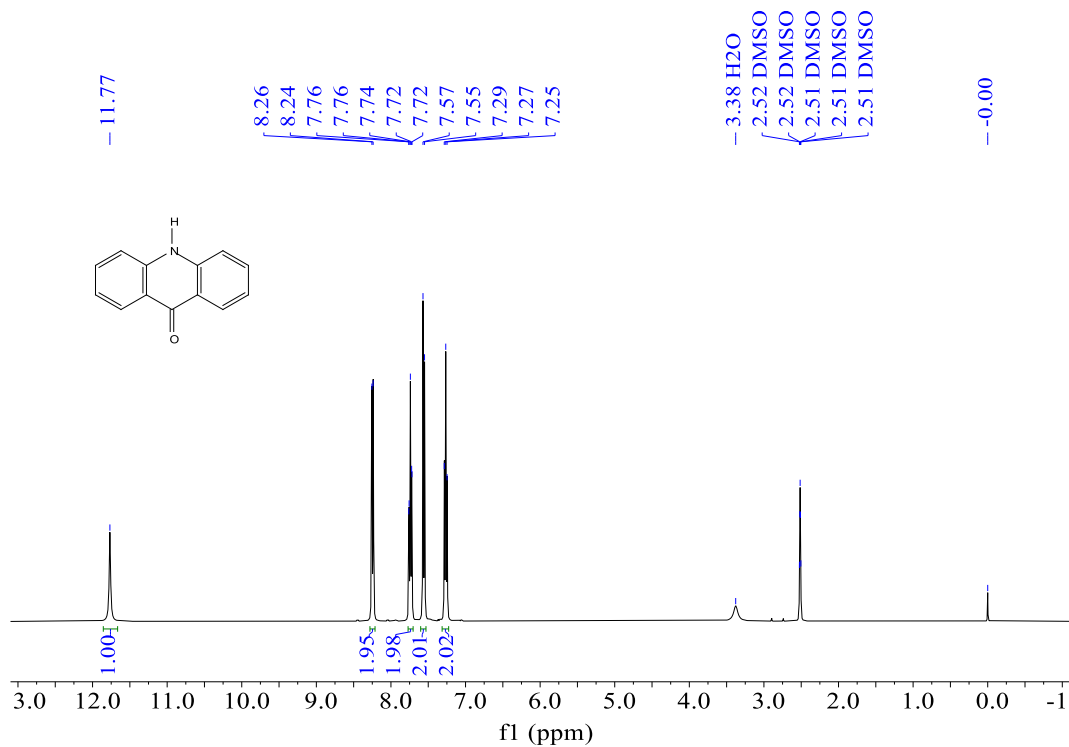

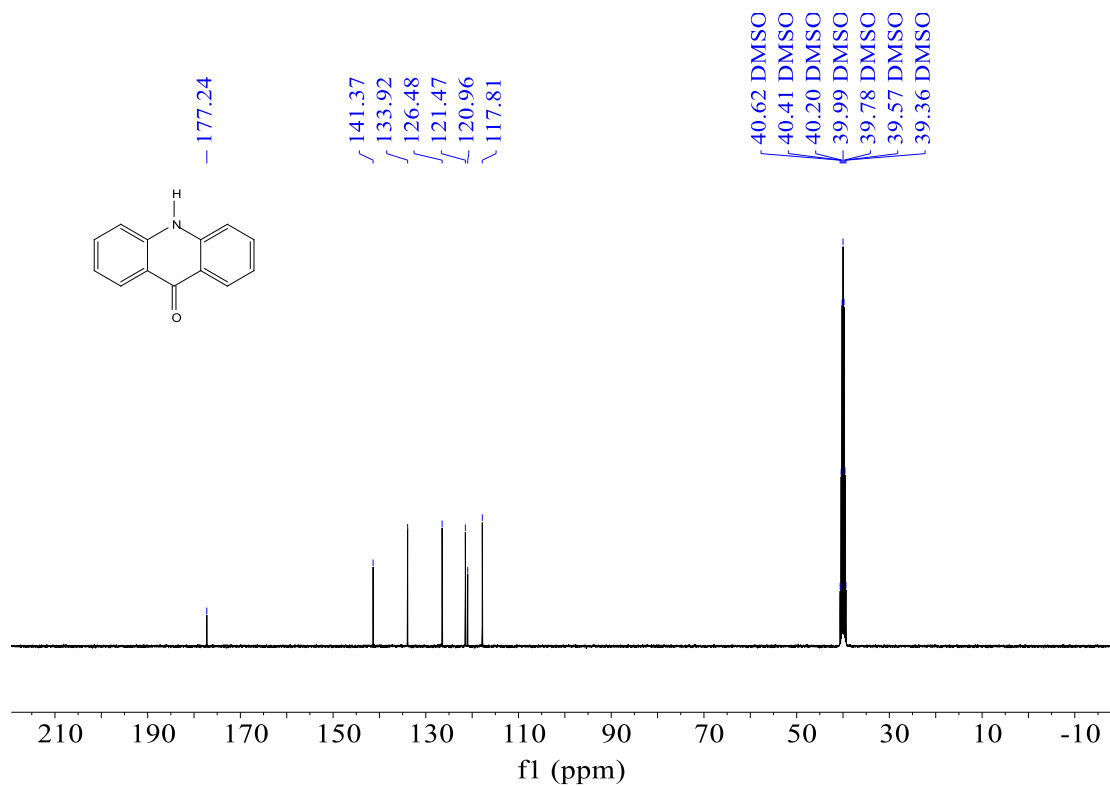

**Diphenylamine (2ag):** White solid, 27.4 mg;  $^1\text{H}$  NMR (400 MHz, Chloroform-d)  $\delta$  7.30 – 7.20 (m, 4H), 7.09 – 7.01 (m, 4H), 6.91 (t,  $J = 7.4$  Hz, 2H).  $^{13}\text{C}$  NMR (101 MHz, Chloroform-d)  $\delta$  143.19, 129.43, 121.08, 117.90.

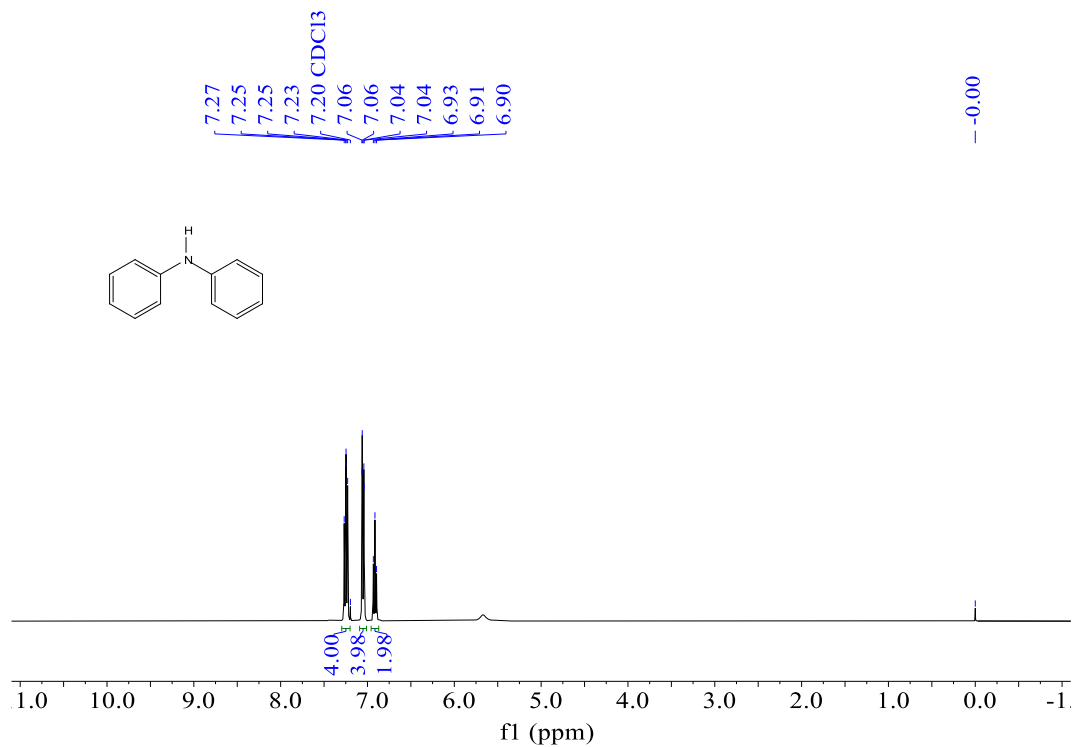

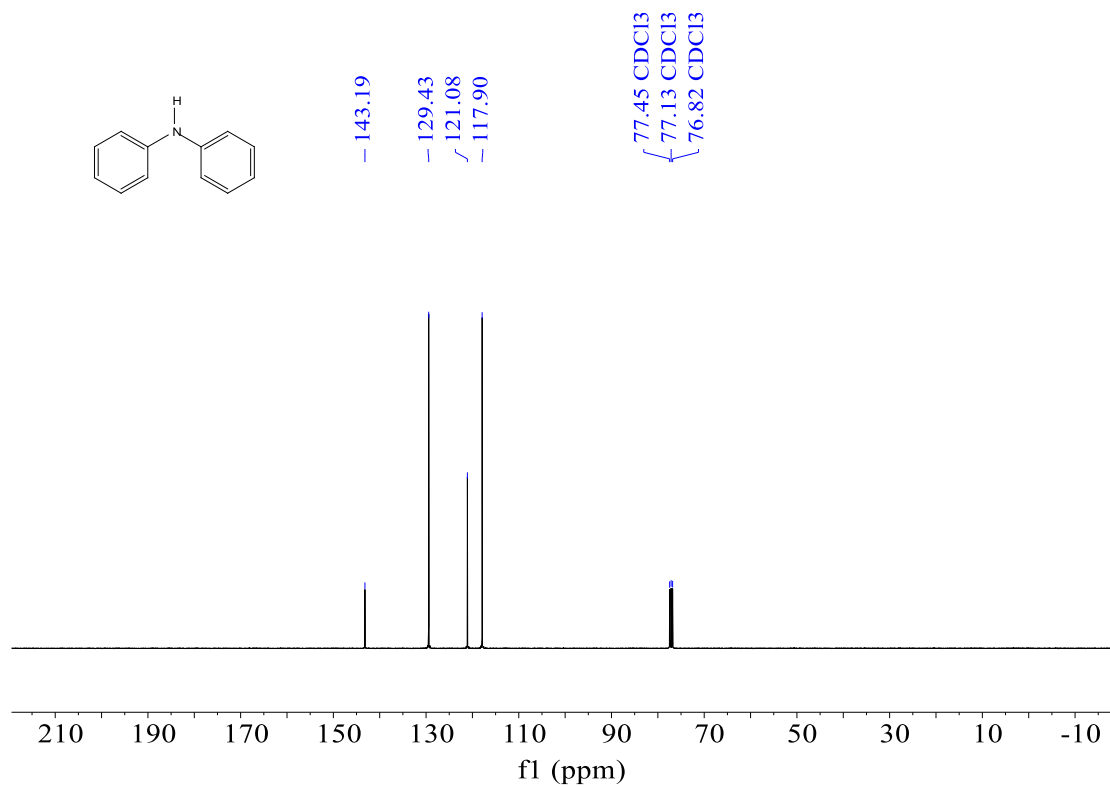

**N-ethylaniline (2ah):** Colorless liquid, 20.1 mg;  $^1\text{H}$  NMR (400 MHz, Chloroform-d)  $\delta$  7.22 – 7.12 (m, 2H), 6.69 (t,  $J = 7.3$  Hz, 1H), 6.61 (d,  $J = 7.3$  Hz, 2H), 3.20 – 3.10 (m, 2H), 1.25 (t,  $J = 7.1$  Hz, 3H).  $^{13}\text{C}$  NMR (101 MHz, Chloroform-d)  $\delta$  147.39, 128.19, 116.21, 111.74, 37.45, 13.85.

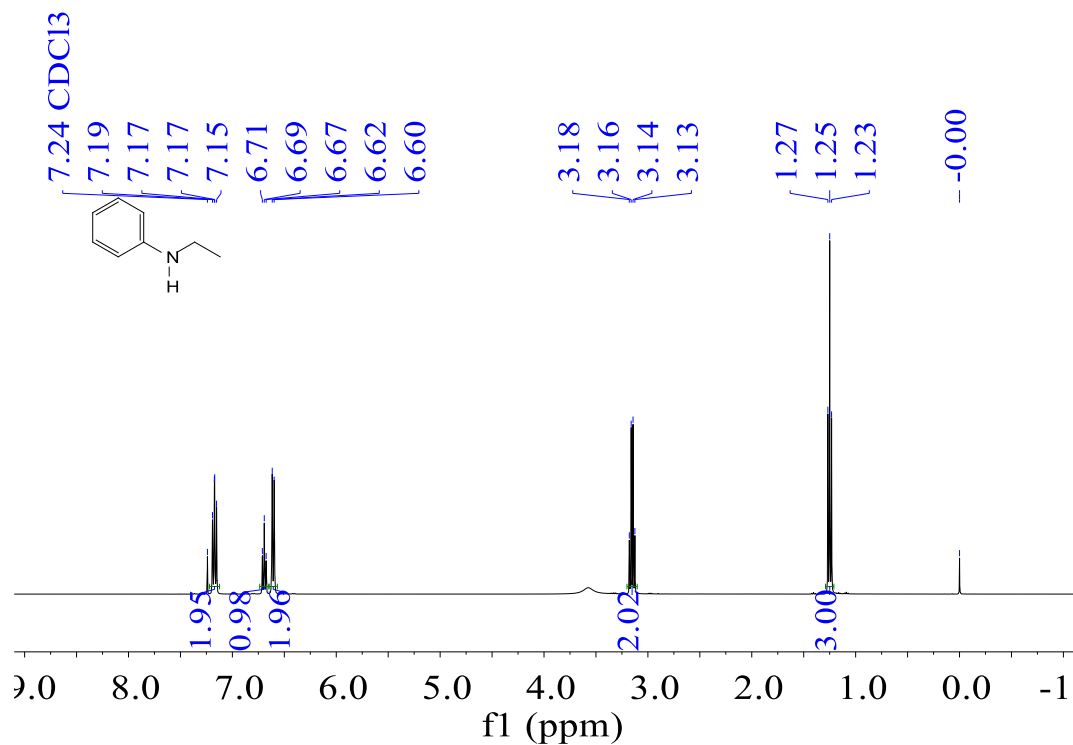

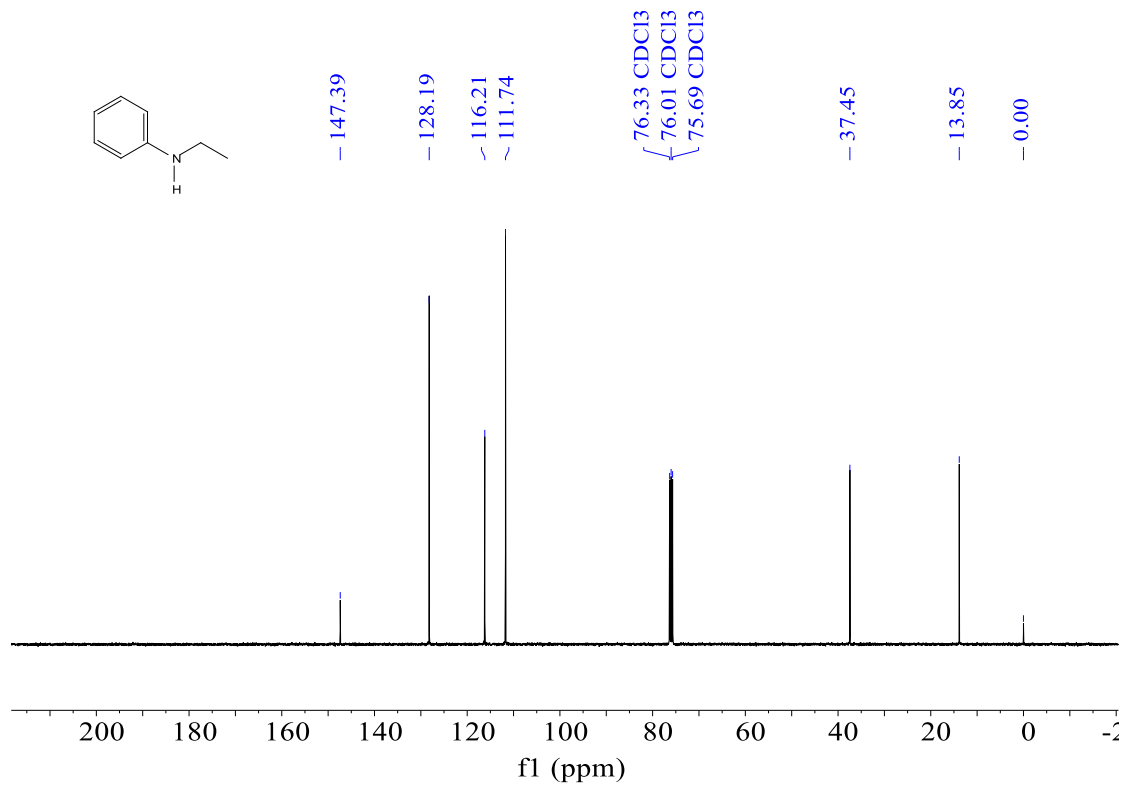

---

## Cartesian coordinates of optimized structures

### **1ah -636.532669**

|   |             |             |             |
|---|-------------|-------------|-------------|
| C | -4.37929900 | 0.37530100  | 0.70176700  |
| C | -3.03618100 | 0.36276800  | 0.32625000  |
| C | -2.43891900 | 1.50139700  | -0.20866700 |
| C | -3.20478700 | 2.65966800  | -0.36335200 |
| C | -4.54247200 | 2.67708900  | 0.01186400  |
| C | -5.13400000 | 1.53240900  | 0.54675200  |
| H | -4.83142500 | -0.51765400 | 1.11731500  |
| H | -2.44830600 | -0.54099300 | 0.45162100  |
| H | -2.73998300 | 3.54954800  | -0.77515200 |
| H | -5.12719900 | 3.58096600  | -0.11374500 |
| H | -6.17728100 | 1.54564400  | 0.83929200  |
| C | -0.98753300 | 1.49296000  | -0.62934600 |
| H | -0.93544400 | 1.72594200  | -1.69593100 |
| H | -0.57727900 | 0.48097800  | -0.49887000 |
| N | -0.20733000 | 2.50683900  | 0.07825000  |
| C | -0.30906400 | 2.42863300  | 1.54398800  |
| H | 0.16402700  | 3.30977100  | 1.97309300  |
| H | -1.36636100 | 2.48766800  | 1.80726000  |
| C | 0.31202100  | 1.16316300  | 2.13367500  |
| H | 0.26522100  | 1.19491000  | 3.22398300  |
| H | -0.21792600 | 0.26707100  | 1.80282200  |
| H | 1.36048700  | 1.07339100  | 1.83753200  |
| C | 1.07661300  | 2.77295900  | -0.43750600 |
| C | 1.82407800  | 3.85224400  | 0.07051500  |
| C | 1.64274500  | 2.02194400  | -1.47881500 |
| C | 3.07563700  | 4.15876700  | -0.44083800 |
| H | 1.40978900  | 4.47341400  | 0.85432000  |
| C | 2.89741400  | 2.34612100  | -1.99357200 |
| H | 1.11983000  | 1.17028500  | -1.89191100 |
| C | 3.62687900  | 3.40991000  | -1.48103100 |
| H | 3.62089400  | 5.00121200  | -0.03054400 |
| H | 3.30494300  | 1.74538700  | -2.79886400 |
| H | 4.60292200  | 3.65557500  | -1.88074100 |

### **1al -326.888167**

|   |             |            |            |
|---|-------------|------------|------------|
| C | -4.71471700 | 0.34342800 | 0.15590500 |
| C | -3.32309800 | 0.38763000 | 0.07794800 |

---

|   |             |             |             |
|---|-------------|-------------|-------------|
| C | -2.65658200 | 1.60093500  | -0.08422000 |
| C | -3.40828000 | 2.77688200  | -0.16080100 |
| C | -4.79538700 | 2.73763100  | -0.08244800 |
| C | -5.45393900 | 1.51833500  | 0.07610000  |
| H | -5.21773700 | -0.60815300 | 0.28320000  |
| H | -2.74977500 | -0.53133000 | 0.14551600  |
| H | -2.89314500 | 3.72379400  | -0.27795200 |
| H | -5.36603600 | 3.65706200  | -0.14580600 |
| H | -6.53536300 | 1.48764900  | 0.13852700  |
| C | -1.14905100 | 1.65183100  | -0.18483800 |
| H | -0.86881600 | 1.98884500  | -1.18724000 |
| H | -0.75321800 | 0.63625100  | -0.06415100 |
| N | -0.59114900 | 2.61258500  | 0.77413600  |
| H | -0.75341000 | 2.28170000  | 1.72069800  |
| H | 0.41546400  | 2.66803200  | 0.65714000  |

**CN -777.200097**

|   |             |             |             |
|---|-------------|-------------|-------------|
| N | -2.07112800 | -3.45282800 | -0.00005700 |
| C | -1.37709000 | 2.25022100  | 0.00005400  |
| C | 0.62940600  | 1.20611500  | 0.00008300  |
| C | -1.48669200 | 0.00013200  | 0.00090000  |
| C | 0.62924600  | -1.20628000 | -0.00033400 |
| C | 2.54833900  | -0.00019600 | 0.00016100  |
| C | -1.37731700 | -2.25002200 | -0.00030800 |
| N | -0.08628200 | 0.00001000  | 0.00015800  |
| N | 1.93664200  | -1.20367700 | -0.00071300 |
| N | 1.93666800  | 1.20357100  | 0.00011300  |
| N | -0.05808300 | 2.35805300  | -0.00081100 |
| N | -2.13910000 | 1.15415200  | 0.00118100  |
| N | -2.13915700 | -1.15411800 | 0.00061600  |
| N | -0.05817000 | -2.35799100 | -0.00090300 |
| N | 3.87161700  | -0.00007400 | 0.00069400  |
| N | -2.07089300 | 3.45292600  | -0.00093700 |
| H | 4.37507700  | -0.87408600 | 0.00045300  |
| H | 4.37478200  | 0.87410700  | 0.00082700  |

**CN<sup>+</sup> (VB) -776.930836**

|   |             |             |             |
|---|-------------|-------------|-------------|
| N | -2.07188300 | -3.45216500 | -0.00104200 |
|---|-------------|-------------|-------------|



---

|   |             |             |             |
|---|-------------|-------------|-------------|
| C | -1.38724500 | 2.27372400  | 0.00018500  |
| C | 0.62985400  | 1.19318800  | -0.00120100 |
| C | -1.47638200 | 0.00007400  | 0.00058100  |
| C | 0.62985600  | -1.19329500 | 0.00040600  |
| C | 2.56468500  | -0.00003700 | 0.00009500  |
| C | -1.38735000 | -2.27363300 | -0.00007700 |
| N | -0.08227000 | -0.00002600 | 0.00012500  |
| N | 1.93026300  | -1.20528100 | 0.00019700  |
| N | 1.93025500  | 1.20514100  | -0.00132200 |
| N | -0.05634900 | 2.35883800  | -0.00183300 |
| N | -2.14015600 | 1.14563200  | 0.00092600  |
| N | -2.14021200 | -1.14556500 | 0.00055800  |
| N | -0.05648600 | -2.35884200 | -0.00007900 |
| N | 3.87262700  | -0.00005100 | 0.00115600  |
| N | -2.07165700 | 3.45232200  | 0.00094600  |
| H | 4.38024000  | -0.87496100 | 0.00205300  |
| H | 4.38032800  | 0.87480600  | 0.00059700  |

**CN<sup>-</sup> (CB) -777.289366**

|   |             |             |             |
|---|-------------|-------------|-------------|
| N | 2.13018400  | -3.44107300 | -0.00297300 |
| C | 1.36319500  | 2.26469000  | -0.00086900 |
| C | -0.65479800 | 1.22030100  | -0.00775700 |
| C | 1.48470700  | 0.00909900  | 0.01179200  |
| C | -0.63957500 | -1.23104600 | -0.00854600 |
| C | -2.56597900 | -0.02025800 | 0.01035900  |
| C | 1.39147800  | -2.24929000 | -0.00059900 |
| N | 0.10620100  | 0.00188200  | 0.02208400  |
| N | -1.93490400 | -1.21266000 | -0.00930500 |
| N | -1.94631600 | 1.18986300  | -0.01160100 |
| N | 0.05725000  | 2.38164100  | -0.01312600 |
| N | 2.14452600  | 1.16834500  | 0.00934500  |
| N | 2.15969400  | -1.13859700 | 0.00907100  |
| N | 0.09050300  | -2.38288100 | -0.01256600 |
| N | -3.96085800 | -0.02077100 | -0.08119400 |
| N | 2.07893200  | 3.46723100  | -0.00262500 |
| H | -4.37443300 | -0.86124300 | 0.30185000  |
| H | -4.37621700 | 0.80939700  | 0.32211000  |

---

|                                          |                    |             |             |  |
|------------------------------------------|--------------------|-------------|-------------|--|
| <b><math>^1\text{O}_2</math></b>         | <b>-150.268924</b> |             |             |  |
| O                                        | 1.81084900         | -1.09761000 | -2.05399900 |  |
| O                                        | 1.32280100         | -2.09159400 | -1.62769600 |  |
| <br>                                     |                    |             |             |  |
| <b><math>\text{O}_2^-</math></b>         | <b>-150.443046</b> |             |             |  |
| O                                        | 1.83815400         | -1.04199900 | -2.07785000 |  |
| O                                        | 1.29549600         | -2.14720500 | -1.60384500 |  |
| <br>                                     |                    |             |             |  |
| <b><math>\text{H}_2\text{O}_2</math></b> | <b>-151.558724</b> |             |             |  |
| H                                        | 1.09406800         | -1.27191200 | -1.85415500 |  |
| H                                        | 2.00267700         | -3.31777500 | -1.08233300 |  |
| O                                        | 2.00318500         | -1.59921100 | -1.85077300 |  |
| O                                        | 2.02265000         | -2.43106600 | -0.69876800 |  |
| <br>                                     |                    |             |             |  |
| <b><math>\text{Cl}^-</math></b>          | <b>-460.367846</b> |             |             |  |
| Cl                                       | 1.21362300         | -2.31395200 | -1.53233100 |  |
| <br>                                     |                    |             |             |  |
| <b><math>\text{Cl}^\bullet</math></b>    | <b>-460.133506</b> |             |             |  |
| Cl                                       | 1.21362300         | -2.31395200 | -1.53233100 |  |
| <br>                                     |                    |             |             |  |
| <b><math>\text{H}_2\text{O}</math></b>   | <b>-76.433271</b>  |             |             |  |
| O                                        | -1.91024900        | 3.15744400  | 2.31703100  |  |
| H                                        | -1.07769400        | 3.39165200  | 2.73647600  |  |
| H                                        | -2.34025000        | 4.00056100  | 2.14911500  |  |
| <br>                                     |                    |             |             |  |
| <b><math>\text{HOO}^\bullet</math></b>   | <b>-150.913908</b> |             |             |  |
| O                                        | 1.79329100         | -1.09600300 | -2.05468800 |  |
| O                                        | 1.77358300         | -2.29298400 | -1.54132300 |  |
| H                                        | 2.73303600         | -0.85312000 | -2.15885700 |  |
| <br>                                     |                    |             |             |  |
| <b><math>\text{HOO}^-</math></b>         | <b>-151.051623</b> |             |             |  |
| O                                        | 1.79471100         | -1.02311100 | -2.08595000 |  |
| O                                        | 1.76916400         | -2.37359000 | -1.50675300 |  |
| H                                        | 2.73603500         | -0.84540600 | -2.16216500 |  |

---

|                |                    |            |             |
|----------------|--------------------|------------|-------------|
| <b>Acetone</b> | <b>-193.145365</b> |            |             |
| O              | -0.01071300        | 2.99888000 | -1.68902900 |
| C              | -0.78031400        | 3.30053900 | -2.57585900 |
| C              | -0.44015400        | 4.35655500 | -3.59674500 |
| H              | -0.34092200        | 3.88321400 | -4.57736600 |
| H              | -1.25152800        | 5.08376800 | -3.67171900 |
| H              | 0.49114100         | 4.85429300 | -3.33439900 |
| C              | -2.12817300        | 2.63927800 | -2.71549400 |
| H              | -2.90855500        | 3.37728100 | -2.51072800 |
| H              | -2.27457800        | 2.29311500 | -3.74084600 |
| H              | -2.21877200        | 1.80863100 | -2.01857900 |

|              |                    |             |             |
|--------------|--------------------|-------------|-------------|
| <b>A-1ah</b> | <b>-636.333705</b> |             |             |
| C            | -4.57267600        | 0.76371000  | -0.33943600 |
| C            | -3.27753800        | 0.34804800  | -0.05851600 |
| C            | -2.22929700        | 1.27015800  | -0.04753400 |
| C            | -2.49253900        | 2.61294900  | -0.30712700 |
| C            | -3.79435800        | 3.02870700  | -0.58122100 |
| C            | -4.83425500        | 2.10735300  | -0.60121900 |
| H            | -5.37914800        | 0.04046200  | -0.34751600 |
| H            | -3.07692600        | -0.69683000 | 0.15352500  |
| H            | -1.69656900        | 3.34918300  | -0.29175800 |
| H            | -3.99033900        | 4.07581000  | -0.77763700 |
| H            | -5.84521900        | 2.43279100  | -0.81425700 |
| C            | -0.82898200        | 0.74860900  | 0.22475000  |
| H            | -0.41206800        | 0.24711700  | -0.64709900 |
| H            | -0.86481700        | 0.00934000  | 1.02730100  |
| N            | 0.08945500         | 1.79812600  | 0.66915200  |
| C            | 0.07583600         | 2.05756400  | 2.11820900  |
| H            | 0.24275300         | 3.11885100  | 2.28775600  |
| H            | -0.93633100        | 1.82812900  | 2.45414200  |
| C            | 1.09726100         | 1.18869600  | 2.84856000  |
| H            | 1.02354700         | 1.38439700  | 3.91826400  |
| H            | 0.89971800         | 0.12982100  | 2.67763400  |
| H            | 2.11275500         | 1.41164000  | 2.51984900  |
| C            | 0.88564900         | 2.46858100  | -0.18439500 |
| C            | 1.89841900         | 3.35301800  | 0.30467100  |
| C            | 0.72291900         | 2.32153900  | -1.59855600 |
| C            | 2.70648000         | 4.02387800  | -0.57845900 |

---

|   |             |            |             |
|---|-------------|------------|-------------|
| H | 2.05298700  | 3.47669800 | 1.36681300  |
| C | 1.53682600  | 3.01523600 | -2.45858200 |
| H | -0.06605900 | 1.69887300 | -1.99649100 |
| C | 2.53697500  | 3.86334400 | -1.96173200 |
| H | 3.48181400  | 4.67803200 | -0.20209300 |
| H | 1.39830900  | 2.91115600 | -3.52661100 |
| H | 3.17812900  | 4.40029900 | -2.64897400 |

**A-1al -326.650469**

|   |             |             |             |
|---|-------------|-------------|-------------|
| C | -4.59997700 | 0.44270100  | 0.41559300  |
| C | -3.22274500 | 0.46638100  | 0.27155900  |
| C | -2.59887700 | 1.63291800  | -0.19657800 |
| C | -3.34702400 | 2.79487300  | -0.43918900 |
| C | -4.72357700 | 2.76030500  | -0.29131600 |
| C | -5.34839700 | 1.58750100  | 0.13674600  |
| H | -5.09306300 | -0.46276800 | 0.74543700  |
| H | -2.63170600 | -0.41687200 | 0.48611800  |
| H | -2.85069100 | 3.69958200  | -0.77185200 |
| H | -5.31248000 | 3.64270100  | -0.50671200 |
| H | -6.42454000 | 1.56705300  | 0.25844500  |
| C | -1.08555700 | 1.65673500  | -0.38427800 |
| H | -0.77067900 | 2.39817600  | -1.11311200 |
| H | -0.67918400 | 0.67450800  | -0.60876700 |
| N | -0.71578200 | 2.06310700  | 0.93789700  |
| H | -0.65805600 | 1.38285600  | 1.69258200  |
| H | -0.75190500 | 3.04335100  | 1.20914300  |

**B-1ah -635.895721**

|   |             |             |             |
|---|-------------|-------------|-------------|
| C | -4.37915300 | 0.02439300  | -0.14648800 |
| C | -2.99785200 | 0.09121700  | -0.19094100 |
| C | -2.31899600 | 1.32353700  | -0.02310900 |
| C | -3.10676600 | 2.48591300  | 0.16446100  |
| C | -4.48984800 | 2.40548700  | 0.20839900  |
| C | -5.13950700 | 1.17872200  | 0.06245700  |
| H | -4.87272800 | -0.93231500 | -0.27374100 |
| H | -2.41543400 | -0.81047100 | -0.34898700 |
| H | -2.62238400 | 3.45306300  | 0.23243700  |
| H | -5.07111800 | 3.31050900  | 0.34422400  |

---

|   |             |            |             |
|---|-------------|------------|-------------|
| H | -6.22049800 | 1.12366100 | 0.09920800  |
| C | -0.89817800 | 1.34975600 | -0.10010700 |
| H | -0.37997000 | 0.50710800 | -0.54675600 |
| N | -0.11545900 | 2.40948500 | 0.32922800  |
| C | -0.30453800 | 2.89853100 | 1.70460500  |
| H | 0.07157600  | 3.92041100 | 1.76276000  |
| H | -1.37369500 | 2.94418900 | 1.89964100  |
| C | 0.35278400  | 1.98713300 | 2.73898800  |
| H | 0.19761100  | 2.38780000 | 3.74259000  |
| H | -0.09646300 | 0.99267300 | 2.69258400  |
| H | 1.42580100  | 1.88571900 | 2.56946500  |
| C | 1.09672400  | 2.66152400 | -0.33013000 |
| C | 2.16666400  | 3.32343300 | 0.29570600  |
| C | 1.24992400  | 2.27406300 | -1.67303300 |
| C | 3.34429900  | 3.57086400 | -0.40023400 |
| H | 2.09642800  | 3.64412100 | 1.32555200  |
| C | 2.43682800  | 2.51799900 | -2.35074800 |
| H | 0.42193200  | 1.80989200 | -2.19363100 |
| C | 3.49697500  | 3.16628700 | -1.72277500 |
| H | 4.15402200  | 4.08196100 | 0.10771500  |
| H | 2.52388900  | 2.21083200 | -3.38659600 |
| H | 4.41961600  | 3.35947300 | -2.25556000 |

**B-1al -326.255006**

|   |             |            |             |
|---|-------------|------------|-------------|
| C | -4.93709200 | 0.98574700 | 0.38429900  |
| C | -3.65019400 | 1.14410800 | 0.87477100  |
| C | -2.70762600 | 1.96133600 | 0.19284800  |
| C | -3.14649500 | 2.61063000 | -0.99471200 |
| C | -4.43217600 | 2.44292100 | -1.46808700 |
| C | -5.34541800 | 1.62571900 | -0.78719900 |
| H | -5.63591400 | 0.35735100 | 0.92547800  |
| H | -3.37768300 | 0.64395700 | 1.79714900  |
| H | -2.44858300 | 3.24421400 | -1.53231800 |
| H | -4.73583500 | 2.94992800 | -2.37719600 |
| H | -6.35306700 | 1.49628100 | -1.16184500 |
| C | -1.38187000 | 2.14266100 | 0.63857700  |
| H | -0.72251700 | 2.81914200 | 0.11061500  |
| N | -0.86967200 | 1.56806700 | 1.77372600  |
| H | 0.13269900  | 1.58299800 | 1.88269600  |

---

|   |             |            |            |
|---|-------------|------------|------------|
| H | -1.29824800 | 0.72291200 | 2.12276100 |
|---|-------------|------------|------------|

**C-1ah -635.757496**

|   |             |             |             |
|---|-------------|-------------|-------------|
| C | -4.53795100 | 0.36518800  | -0.63064900 |
| C | -3.20370200 | 0.64583100  | -0.88215700 |
| C | -2.55548800 | 1.66833400  | -0.17328000 |
| C | -3.27971100 | 2.45740800  | 0.73325600  |
| C | -4.62200900 | 2.19045900  | 0.95340100  |
| C | -5.24538400 | 1.13628400  | 0.28810700  |
| H | -5.02952800 | -0.43992700 | -1.16142300 |
| H | -2.65394200 | 0.06811600  | -1.61643500 |
| H | -2.81616100 | 3.30143500  | 1.22657500  |
| H | -5.18510000 | 2.80894800  | 1.64048000  |
| H | -6.29220900 | 0.92827400  | 0.47328300  |
| C | -1.16083500 | 1.89683300  | -0.51269800 |
| H | -0.86510500 | 1.67896600  | -1.53619600 |
| N | -0.20693300 | 2.32587500  | 0.24559700  |
| C | -0.31688300 | 2.55752300  | 1.71211900  |
| H | -0.39960800 | 3.63405000  | 1.87341500  |
| H | -1.23679900 | 2.08131600  | 2.03989900  |
| C | 0.87179300  | 1.96636900  | 2.45398100  |
| H | 0.68265800  | 2.06920100  | 3.52266800  |
| H | 0.98146800  | 0.90550400  | 2.22375000  |
| H | 1.80239000  | 2.48092600  | 2.21825600  |
| C | 1.10019200  | 2.54956400  | -0.34534200 |
| C | 1.63814100  | 3.82955400  | -0.30155800 |
| C | 1.77954600  | 1.48349800  | -0.91719600 |
| C | 2.89194600  | 4.04308900  | -0.86149400 |
| H | 1.08472300  | 4.64397300  | 0.15059200  |
| C | 3.03344700  | 1.71264800  | -1.47519800 |
| H | 1.34156700  | 0.49208700  | -0.91238400 |
| C | 3.58806700  | 2.98792600  | -1.44667500 |
| H | 3.32187200  | 5.03655200  | -0.84321400 |
| H | 3.57639000  | 0.89008300  | -1.92315300 |
| H | 4.56563200  | 3.16108500  | -1.87914200 |

**C-1al -326.118405**

|   |             |            |            |
|---|-------------|------------|------------|
| C | -4.94870900 | 0.96458200 | 0.37911700 |
|---|-------------|------------|------------|

---

|   |             |            |             |
|---|-------------|------------|-------------|
| C | -3.66065500 | 1.08609400 | 0.86478600  |
| C | -2.74052000 | 1.90451000 | 0.18804400  |
| C | -3.12871400 | 2.59481800 | -0.96955900 |
| C | -4.42336700 | 2.46733500 | -1.45019500 |
| C | -5.32838400 | 1.65359600 | -0.77633100 |
| H | -5.66284000 | 0.33583700 | 0.89467900  |
| H | -3.38367700 | 0.54703900 | 1.76282900  |
| H | -2.41275800 | 3.22551600 | -1.48379100 |
| H | -4.72500300 | 2.99861600 | -2.34332000 |
| H | -6.34033700 | 1.55199500 | -1.14946800 |
| C | -1.38012100 | 2.08430700 | 0.62342700  |
| H | -0.74094600 | 2.74403500 | 0.04468200  |
| N | -0.83410900 | 1.53034400 | 1.65034700  |
| H | 0.13429300  | 1.71638000 | 1.88524900  |
| H | -1.33384400 | 0.89296600 | 2.26106700  |

**D-1ah -712.199664**

|   |             |             |             |
|---|-------------|-------------|-------------|
| C | -4.28794900 | 0.35660900  | 0.62214000  |
| C | -2.98973200 | 0.47315800  | 0.13440200  |
| C | -2.51836000 | 1.71103800  | -0.29558200 |
| C | -3.35057600 | 2.83157000  | -0.25397400 |
| C | -4.64494200 | 2.71230000  | 0.23609400  |
| C | -5.11218200 | 1.47578700  | 0.67733400  |
| H | -4.65446800 | -0.60712300 | 0.95303100  |
| H | -2.35118800 | -0.40196200 | 0.08131800  |
| H | -2.99669300 | 3.79075600  | -0.61818100 |
| H | -5.29063700 | 3.58105300  | 0.26806600  |
| H | -6.12285900 | 1.38479800  | 1.05636400  |
| C | -1.10927800 | 1.84137000  | -0.81345200 |
| H | -0.64303200 | 0.86003800  | -0.91350100 |
| N | -0.25507600 | 2.63427100  | 0.16884400  |
| C | -0.27050000 | 2.09198600  | 1.59181700  |
| H | 0.27387200  | 2.83177500  | 2.17747400  |
| H | -1.31456300 | 2.09903900  | 1.90168800  |
| C | 0.35076300  | 0.71748300  | 1.72971000  |
| H | 0.25667400  | 0.42413100  | 2.77569500  |
| H | -0.16092800 | -0.03716100 | 1.13175000  |
| H | 1.41045700  | 0.72144000  | 1.47731900  |
| C | 1.11934500  | 2.89351300  | -0.31807900 |

---

|   |             |            |             |
|---|-------------|------------|-------------|
| C | 1.62253400  | 4.17374400 | -0.14483900 |
| C | 1.87395100  | 1.88029000 | -0.89109300 |
| C | 2.92352300  | 4.44742800 | -0.55349400 |
| H | 1.01252200  | 4.95185000 | 0.30209400  |
| C | 3.17239700  | 2.16790300 | -1.29682300 |
| H | 1.47673400  | 0.88339500 | -1.03123900 |
| C | 3.69767600  | 3.44565500 | -1.12830600 |
| H | 3.32425100  | 5.44463900 | -0.42422500 |
| H | 3.77113800  | 1.38658400 | -1.74725800 |
| H | 4.70950500  | 3.66018200 | -1.44867800 |
| H | -0.71337400 | 3.55208000 | 0.21246000  |
| O | -1.00434100 | 2.59817800 | -1.97866600 |
| H | -1.62869900 | 2.26028300 | -2.63124400 |

**D-1al -402.557291**

|   |             |            |             |
|---|-------------|------------|-------------|
| C | -5.03246200 | 0.82252900 | 0.33149100  |
| C | -3.74071800 | 0.80607800 | 0.82721100  |
| C | -2.81459300 | 1.75874600 | 0.37701100  |
| C | -3.19499700 | 2.71802900 | -0.57079600 |
| C | -4.49222800 | 2.72975100 | -1.06194400 |
| C | -5.40735000 | 1.78360700 | -0.60973700 |
| H | -5.75071300 | 0.08878800 | 0.67377200  |
| H | -3.46679500 | 0.04999200 | 1.55347300  |
| H | -2.47220300 | 3.45220900 | -0.90819800 |
| H | -4.78901000 | 3.47124000 | -1.79228900 |
| H | -6.42097000 | 1.79017400 | -0.99211900 |
| C | -1.45016400 | 1.81338400 | 0.84738600  |
| H | -0.78756700 | 2.55281100 | 0.41379600  |
| N | -0.93531700 | 1.03883600 | 1.73798900  |
| H | 0.03681600  | 1.13468200 | 2.00648500  |
| H | -1.46868000 | 0.32149400 | 2.21619900  |
| O | -1.84177600 | 4.22555400 | 1.95154800  |
| H | -1.34791700 | 4.76935000 | 2.57265300  |
| H | -2.74051700 | 4.56805600 | 1.97983000  |

**2ah -366.632596**

|   |             |            |            |
|---|-------------|------------|------------|
| N | 0.54390200  | 3.19671500 | 1.48198900 |
| C | -0.08169700 | 1.81359400 | 1.48696800 |



---

|   |             |            |             |
|---|-------------|------------|-------------|
| H | 0.70934800  | 1.12764400 | 1.78653900  |
| H | -0.84545400 | 1.83925600 | 2.26254900  |
| C | -0.65524400 | 1.47106000 | 0.12947900  |
| H | -1.13195900 | 0.49329300 | 0.19672800  |
| H | -1.41308500 | 2.19552100 | -0.17540900 |
| H | 0.12120700  | 1.41965600 | -0.63410400 |
| C | 1.67001000  | 3.35165900 | 0.54566800  |
| C | 1.46650700  | 4.02391000 | -0.64837500 |
| C | 2.89095700  | 2.78824300 | 0.88365900  |
| C | 2.53214900  | 4.13622500 | -1.53601700 |
| H | 0.50041300  | 4.45363500 | -0.88835500 |
| C | 3.94683800  | 2.90984600 | -0.01221100 |
| H | 3.02293600  | 2.27064000 | 1.82701400  |
| C | 3.76738300  | 3.58087200 | -1.21893700 |
| H | 2.39197700  | 4.65955400 | -2.47313900 |
| H | 4.90940500  | 2.48198700 | 0.23714800  |
| H | 4.59401000  | 3.67305300 | -1.91223200 |
| H | -0.17994800 | 3.88593700 | 1.25814900  |
| H | 0.85468300  | 3.42274800 | 2.43162800  |

**2al -56.554919**

|   |             |            |            |
|---|-------------|------------|------------|
| N | -1.62892300 | 1.05562900 | 0.96745300 |
| H | -1.24648000 | 0.11543000 | 0.96709700 |
| H | -1.24647200 | 1.52597600 | 1.78153000 |
| H | -1.24643000 | 1.52568900 | 0.15316200 |

**E-1al -325.677172**

|   |             |             |            |
|---|-------------|-------------|------------|
| C | -1.43141700 | 1.98568700  | 1.93439400 |
| C | -1.80995100 | 1.36857600  | 0.74520500 |
| C | -0.93747400 | 0.49522800  | 0.09472600 |
| C | 0.32343700  | 0.24201400  | 0.64498500 |
| C | 0.70049000  | 0.85704100  | 1.83008700 |
| C | -0.17642500 | 1.72998200  | 2.47682800 |
| H | -2.11333400 | 2.66276800  | 2.43448000 |
| H | -2.78795000 | 1.56455500  | 0.31775900 |
| H | 0.99351300  | -0.43774100 | 0.13227400 |
| H | 1.67757100  | 0.65982800  | 2.25486700 |
| H | 0.12153500  | 2.20852900  | 3.40228200 |

---

|   |             |             |             |
|---|-------------|-------------|-------------|
| C | -1.36929000 | -0.14424300 | -1.16629200 |
| H | -2.37629800 | 0.12733500  | -1.50081300 |
| N | -0.62843400 | -0.94812600 | -1.81314800 |
| H | -1.10859100 | -1.27700200 | -2.65013700 |

**F-1al -401.590763**

|   |             |             |             |
|---|-------------|-------------|-------------|
| C | -1.41670200 | 2.00772500  | 1.93444600  |
| C | -1.84835200 | 1.37555500  | 0.77219200  |
| C | -1.02259200 | 0.47709800  | 0.08881300  |
| C | 0.24905400  | 0.22643900  | 0.60384200  |
| C | 0.69026600  | 0.86186900  | 1.76455800  |
| C | -0.14076100 | 1.75372000  | 2.43605900  |
| H | -2.07336200 | 2.70092400  | 2.44881200  |
| H | -2.83549000 | 1.58367200  | 0.37547700  |
| H | 0.88253800  | -0.47250100 | 0.07308300  |
| H | 1.68501600  | 0.65786300  | 2.14603800  |
| H | 0.19963000  | 2.24608800  | 3.33994900  |
| C | -1.53527100 | -0.24182900 | -1.16152700 |
| N | -0.51441100 | -0.83757700 | -1.90290000 |
| H | -0.96304200 | -1.48075300 | -2.55484400 |
| H | -2.34529800 | -0.91935700 | -0.82712800 |
| O | -2.32782900 | 0.75934500  | -1.93909700 |
| H | -1.67977800 | 1.05844100  | -2.58844600 |

**G-1al -402.125503**

|   |             |             |             |
|---|-------------|-------------|-------------|
| C | -1.41999900 | 2.15492300  | 1.59779100  |
| C | -1.87837200 | 1.43819200  | 0.49405900  |
| C | -1.27365600 | 0.23639100  | 0.13787300  |
| C | -0.21177400 | -0.24749400 | 0.90434600  |
| C | 0.24711300  | 0.46590600  | 2.00610000  |
| C | -0.35665800 | 1.67264700  | 2.35403000  |
| H | -1.89792900 | 3.08926200  | 1.86800200  |
| H | -2.71740800 | 1.81190600  | -0.08043300 |
| H | 0.25366100  | -1.19264600 | 0.64008700  |
| H | 1.06970500  | 0.07907200  | 2.59594600  |
| H | -0.00323400 | 2.22930000  | 3.21381200  |
| C | -1.71694800 | -0.54962500 | -1.08473400 |
| N | -0.78009900 | -0.30952700 | -2.17221700 |

---

|   |             |             |             |
|---|-------------|-------------|-------------|
| H | -0.82634900 | -1.05775400 | -2.85687900 |
| H | -1.78597600 | -1.60819000 | -0.80941800 |
| O | -3.01314800 | -0.20724400 | -1.52591000 |
| H | -2.92068100 | 0.58543700  | -2.06810500 |
| H | 0.17396600  | -0.25627900 | -1.83326500 |

**TS1 -829.449352, 1092.77i**

|   |             |             |             |
|---|-------------|-------------|-------------|
| C | -4.63949600 | 0.54769400  | 0.50716900  |
| C | -3.34196500 | 0.42477600  | 0.03154700  |
| C | -2.32699700 | 1.28085300  | 0.48688500  |
| C | -2.65493600 | 2.28150900  | 1.40998900  |
| C | -3.95561400 | 2.39699700  | 1.88871700  |
| C | -4.94940100 | 1.52702500  | 1.44952300  |
| H | -5.41055200 | -0.12025600 | 0.14248200  |
| H | -3.11096500 | -0.33599700 | -0.70834300 |
| H | -1.90285600 | 2.99306900  | 1.73035300  |
| H | -4.19469600 | 3.18013100  | 2.59824100  |
| H | -5.96063600 | 1.62054100  | 1.82598500  |
| C | -0.96122600 | 1.09715500  | -0.06020300 |
| H | -0.92671800 | 1.00472400  | -1.14345400 |
| H | -0.75566500 | -0.33746000 | 0.16396300  |
| N | 0.12246200  | 1.79209100  | 0.46060900  |
| C | 0.45696400  | 1.63943600  | 1.88640000  |
| H | 0.89933900  | 2.57365900  | 2.23222800  |
| H | -0.47491100 | 1.50516000  | 2.43272500  |
| C | 1.37849400  | 0.44936000  | 2.15767600  |
| H | 1.61710800  | 0.42412700  | 3.22198800  |
| H | 0.89206600  | -0.49147900 | 1.90104800  |
| H | 2.30908600  | 0.50521300  | 1.59474000  |
| C | 1.00510100  | 2.48507900  | -0.38797600 |
| C | 2.31848800  | 2.78156000  | 0.01147000  |
| C | 0.55636900  | 2.94273800  | -1.63836800 |
| C | 3.16355500  | 3.47911200  | -0.83934600 |
| H | 2.69206200  | 2.47279900  | 0.97683900  |
| C | 1.41647700  | 3.63134600  | -2.48105300 |
| H | -0.47489300 | 2.80495000  | -1.93403600 |
| C | 2.72644000  | 3.89710900  | -2.09340400 |
| H | 4.17505000  | 3.69314100  | -0.51665100 |
| H | 1.04965100  | 3.98057800  | -3.43842100 |

---

|   |             |             |             |
|---|-------------|-------------|-------------|
| H | 3.39331000  | 4.43865900  | -2.75242100 |
| C | -1.16427900 | -2.19631500 | 1.03106100  |
| C | -1.09167200 | -3.67210100 | 0.91555400  |
| H | -0.82714700 | -3.97420800 | -0.09414800 |
| H | -0.32271900 | -4.01282800 | 1.61762400  |
| H | -2.03522200 | -4.11775200 | 1.23472800  |
| C | -1.80055600 | -1.59211100 | 2.23009500  |
| H | -2.88521400 | -1.67942100 | 2.09598700  |
| H | -1.53587000 | -2.17194700 | 3.11504000  |
| H | -1.55038700 | -0.54176000 | 2.35978900  |
| O | -0.68083800 | -1.51361800 | 0.10938100  |

**TS2 -786.789577, 987.51i**

|   |             |             |             |
|---|-------------|-------------|-------------|
| C | -4.29866200 | 1.17028800  | -1.18656800 |
| C | -3.18431200 | 0.74603400  | -0.46592300 |
| C | -2.24278800 | 1.67261500  | -0.00245000 |
| C | -2.42883500 | 3.03406300  | -0.28070400 |
| C | -3.54113400 | 3.45130500  | -0.99398300 |
| C | -4.47508300 | 2.52016400  | -1.45604800 |
| H | -5.02258900 | 0.44350700  | -1.53424200 |
| H | -3.05206400 | -0.30647600 | -0.24165500 |
| H | -1.71900900 | 3.76483400  | 0.08649100  |
| H | -3.68902500 | 4.50704900  | -1.18705900 |
| H | -5.33995000 | 2.85445400  | -2.01660800 |
| C | -1.09831500 | 1.14644400  | 0.77984200  |
| H | -0.68365100 | 0.24069700  | 0.02696200  |
| H | -1.41785700 | 0.51992000  | 1.61470900  |
| N | -0.04214500 | 1.97335200  | 1.15686800  |
| C | 0.77291900  | 1.47235100  | 2.27726200  |
| H | 1.36944200  | 2.29686800  | 2.66318400  |
| H | 0.09040000  | 1.16814100  | 3.07205700  |
| C | 1.67572900  | 0.31613100  | 1.85485400  |
| H | 2.28743200  | -0.00909000 | 2.69785400  |
| H | 1.08530000  | -0.53705300 | 1.51194200  |
| H | 2.33910800  | 0.62688600  | 1.04454600  |
| C | 0.62933500  | 2.78271600  | 0.19983800  |
| C | 1.31517600  | 3.92109300  | 0.63917200  |
| C | 0.61231800  | 2.48040300  | -1.16596500 |
| C | 1.97843500  | 4.73507100  | -0.26934600 |
| H | 1.30604400  | 4.18489400  | 1.68955900  |

---

|   |             |             |             |
|---|-------------|-------------|-------------|
| C | 1.27060200  | 3.31058900  | -2.06840200 |
| H | 0.08729500  | 1.60901500  | -1.53552300 |
| C | 1.96003000  | 4.43567500  | -1.62961900 |
| H | 2.50007900  | 5.61492000  | 0.08806900  |
| H | 1.24762700  | 3.06426300  | -3.12344600 |
| H | 2.47413600  | 5.07412100  | -2.33749100 |
| O | -1.17017400 | -0.29058900 | -1.97713700 |
| O | -0.46842400 | -0.58708000 | -0.96655700 |

**TS3     -1096.701415, 148.09i**

|   |             |             |             |
|---|-------------|-------------|-------------|
| C | -4.37606000 | 1.32326100  | -0.92644200 |
| C | -3.26821000 | 0.89553300  | -0.21015600 |
| C | -2.25390700 | 1.79618500  | 0.16179400  |
| C | -2.39551800 | 3.14547900  | -0.20265400 |
| C | -3.50958800 | 3.56797400  | -0.91845800 |
| C | -4.50074000 | 2.66334400  | -1.29110700 |
| H | -5.14447100 | 0.61050100  | -1.20161600 |
| H | -3.17729300 | -0.14912000 | 0.06993200  |
| H | -1.64888800 | 3.87172900  | 0.09250900  |
| H | -3.60587800 | 4.61495800  | -1.18158900 |
| H | -5.36403800 | 2.99916500  | -1.85265800 |
| C | -1.12605200 | 1.26729400  | 0.93216200  |
| H | -0.61921900 | 0.05893500  | -0.07310300 |
| H | -1.38164900 | 0.51515700  | 1.67488200  |
| N | -0.01990400 | 2.00947400  | 1.28148200  |
| C | 0.76666100  | 1.53147400  | 2.43160100  |
| H | 1.31054100  | 2.37759400  | 2.84800800  |
| H | 0.06255400  | 1.19342400  | 3.19193100  |
| C | 1.73368600  | 0.41963100  | 2.03905000  |
| H | 2.33532200  | 0.13035600  | 2.90218800  |
| H | 1.19372600  | -0.45985000 | 1.68345700  |
| H | 2.40514600  | 0.75868200  | 1.24687700  |
| C | 0.64311100  | 2.86670900  | 0.35949200  |
| C | 1.30054500  | 4.00782000  | 0.82923800  |
| C | 0.64104200  | 2.59044300  | -1.01071400 |
| C | 1.95043600  | 4.85392700  | -0.06095700 |
| H | 1.28118200  | 4.25138700  | 1.88411800  |
| C | 1.28915700  | 3.44621300  | -1.89338900 |
| H | 0.13432700  | 1.71134600  | -1.38726700 |
| C | 1.94856800  | 4.57918800  | -1.42588000 |

---

|    |             |             |             |
|----|-------------|-------------|-------------|
| H  | 2.45014700  | 5.73817200  | 0.31604700  |
| H  | 1.28188200  | 3.21876000  | -2.95268900 |
| H  | 2.45345200  | 5.24238300  | -2.11738700 |
| Cl | -0.24776700 | -1.01690200 | -0.89859500 |

**TS4 -712.141904, 1426.49i**

|   |             |             |             |
|---|-------------|-------------|-------------|
| C | -3.34481800 | -0.33518700 | -0.14026100 |
| C | -2.38107200 | 0.51912400  | -0.66342400 |
| C | -2.43494800 | 1.88406700  | -0.38327300 |
| C | -3.47781900 | 2.40171500  | 0.38436900  |
| C | -4.44209800 | 1.54423100  | 0.90072800  |
| C | -4.37062400 | 0.17641800  | 0.64877700  |
| H | -3.29861800 | -1.39513500 | -0.35657100 |
| H | -1.59137500 | 0.12133300  | -1.29186900 |
| H | -3.54865100 | 3.46770500  | 0.56518300  |
| H | -5.25251100 | 1.94574100  | 1.49626500  |
| H | -5.12344600 | -0.48798500 | 1.05511300  |
| C | -1.33490000 | 2.74825800  | -0.91016100 |
| H | -0.89142200 | 2.34544900  | -1.81797900 |
| N | -0.25376300 | 3.22650600  | -0.01134500 |
| C | -0.49015000 | 3.18956200  | 1.46518500  |
| H | 0.21081600  | 3.91431600  | 1.88072500  |
| H | -1.49388100 | 3.57539800  | 1.64220100  |
| C | -0.29776600 | 1.82758400  | 2.11327700  |
| H | -0.49122200 | 1.92488900  | 3.18268300  |
| H | -0.98587100 | 1.08256300  | 1.71137300  |
| H | 0.72524300  | 1.47045600  | 1.98764000  |
| C | 1.09549300  | 2.85309200  | -0.39143100 |
| C | 2.07083200  | 3.84378400  | -0.39336500 |
| C | 1.41561800  | 1.53700800  | -0.70905500 |
| C | 3.38032300  | 3.51298100  | -0.72573800 |
| H | 1.80137000  | 4.86305200  | -0.14057800 |
| C | 2.72506300  | 1.21577000  | -1.05151000 |
| H | 0.65510800  | 0.76437200  | -0.67578600 |
| C | 3.70729100  | 2.20165800  | -1.05891200 |
| H | 4.14155800  | 4.28322100  | -0.73206500 |
| H | 2.97612900  | 0.19271700  | -1.30251400 |
| H | 4.72658500  | 1.94790700  | -1.32273100 |
| H | -0.85183900 | 4.37949400  | -0.61982600 |

---

|   |             |            |             |
|---|-------------|------------|-------------|
| O | -1.81459800 | 4.13289600 | -1.19192800 |
| H | -1.88407200 | 4.36312000 | -2.13423100 |

**TS5 -402.506072, 1547.42i**

|   |             |            |             |
|---|-------------|------------|-------------|
| C | -5.09709700 | 1.03761800 | 0.69318300  |
| C | -3.92509300 | 1.50382300 | 1.27584500  |
| C | -3.06489900 | 2.31511100 | 0.53504300  |
| C | -3.37516800 | 2.66024200 | -0.77823500 |
| C | -4.54743500 | 2.18553600 | -1.35746200 |
| C | -5.40722100 | 1.37583400 | -0.62232600 |
| H | -5.77113800 | 0.41440200 | 1.26761000  |
| H | -3.69205100 | 1.25152500 | 2.30409500  |
| H | -2.70554400 | 3.29725700 | -1.34540200 |
| H | -4.79028600 | 2.45443400 | -2.37791100 |
| H | -6.32331200 | 1.01206800 | -1.07160600 |
| C | -1.77159200 | 2.78970400 | 1.11270900  |
| H | -1.36792900 | 3.66315900 | 0.60875500  |
| N | -0.74212300 | 1.76455000 | 1.32957900  |
| H | -1.02154200 | 2.30027400 | 2.58928400  |
| H | 0.15426900  | 1.97220000 | 0.89856300  |
| O | -1.89732100 | 3.07717800 | 2.57055300  |
| H | -1.03647700 | 0.82040000 | 1.09337000  |
| H | -1.73520300 | 3.99999500 | 2.82811400  |

**TS6 -477.158556, 888.47i**

|   |             |            |             |
|---|-------------|------------|-------------|
| C | -4.02166200 | 3.33913600 | 1.43119100  |
| C | -4.16581900 | 2.70096900 | 0.20239100  |
| C | -3.28373000 | 1.68705500 | -0.16821400 |
| C | -2.24346700 | 1.32935700 | 0.69391000  |
| C | -2.10606300 | 1.96236400 | 1.92393400  |
| C | -2.99562600 | 2.96850200 | 2.29532600  |
| H | -4.71390300 | 4.12317600 | 1.71415400  |
| H | -4.96929100 | 2.98602000 | -0.46785900 |
| H | -1.53177200 | 0.56723600 | 0.38920800  |
| H | -1.29801000 | 1.67916500 | 2.58783200  |
| H | -2.88527500 | 3.46460600 | 3.25211600  |
| C | -3.42200000 | 0.99788100 | -1.48629200 |
| H | -2.35966800 | 1.27445600 | -2.08957900 |
| H | -4.19833300 | 1.37940000 | -2.14542500 |

---

|   |             |             |             |
|---|-------------|-------------|-------------|
| N | -3.33239200 | -0.37272000 | -1.45907400 |
| H | -3.15903000 | -0.85558400 | -0.58850700 |
| H | -3.78549200 | -0.92104900 | -2.17535900 |
| O | -1.19047100 | 0.70745500  | -2.45226500 |
| O | -1.37569700 | -0.52958300 | -2.18153400 |

**TS7 -401.581416, 274.27i**

|   |             |             |             |
|---|-------------|-------------|-------------|
| C | -1.51636300 | 1.79309300  | 2.04357900  |
| C | -1.99159500 | 1.07310100  | 0.95136100  |
| C | -1.11928600 | 0.35201300  | 0.13478800  |
| C | 0.24356500  | 0.35842300  | 0.43751800  |
| C | 0.72441100  | 1.08343800  | 1.52328200  |
| C | -0.15354800 | 1.80331100  | 2.33218600  |
| H | -2.20782500 | 2.34594100  | 2.66944500  |
| H | -3.05225000 | 1.07427200  | 0.72014100  |
| H | 0.91591500  | -0.21702000 | -0.18735100 |
| H | 1.78588600  | 1.08289000  | 1.74515400  |
| H | 0.22061800  | 2.36340000  | 3.18134200  |
| C | -1.65614300 | -0.44621700 | -1.00974600 |
| N | -0.90784300 | -1.37558300 | -1.53506300 |
| H | -1.47220300 | -1.93275400 | -2.17352600 |
| H | -2.74612800 | -0.49885000 | -1.02785600 |
| O | -1.86867500 | 1.11845600  | -2.26970000 |
| H | -1.01425800 | 0.99864300  | -2.69560700 |

**TS8 -478.048126, 1008.89i**

|   |             |             |             |
|---|-------------|-------------|-------------|
| C | -1.01753700 | 2.17875700  | 1.32311000  |
| C | -1.53914500 | 1.46672200  | 0.24592800  |
| C | -1.22457400 | 0.12037500  | 0.06613900  |
| C | -0.39365600 | -0.50627200 | 0.99480500  |
| C | 0.12922300  | 0.19981800  | 2.07496100  |
| C | -0.17903800 | 1.54847700  | 2.23983300  |
| H | -1.26584500 | 3.22672000  | 1.44857400  |
| H | -2.19699700 | 1.95717200  | -0.46274100 |
| H | -0.14533500 | -1.55523900 | 0.86174300  |
| H | 0.77498100  | -0.30074800 | 2.78756400  |
| H | 0.22588500  | 2.10188600  | 3.07911900  |
| C | -1.69572600 | -0.64264400 | -1.16138700 |



---

|   |             |             |             |
|---|-------------|-------------|-------------|
| N | -0.83349800 | -0.36381400 | -2.25813600 |
| H | -0.84741300 | -1.15037300 | -2.90240700 |
| H | -1.75171300 | -1.70780400 | -0.89059400 |
| O | -3.07047700 | -0.28905800 | -1.46562800 |
| H | -2.98422800 | 0.29682100  | -2.22651500 |
| O | 1.48153900  | 0.41697300  | -1.70499400 |
| H | 1.48952000  | 0.53653900  | -0.75128400 |
| H | 0.36748000  | 0.02976100  | -1.95928700 |

**TS9 -402.071219, 1510.68i**

|   |             |             |             |
|---|-------------|-------------|-------------|
| C | -1.36550600 | 2.17998100  | 1.63218200  |
| C | -1.88627200 | 1.46019500  | 0.55888500  |
| C | -1.33852100 | 0.22873500  | 0.21262900  |
| C | -0.27215700 | -0.28482800 | 0.95236600  |
| C | 0.24973200  | 0.43327100  | 2.02281100  |
| C | -0.29731700 | 1.66927700  | 2.36387800  |
| H | -1.79702700 | 3.13730900  | 1.90053900  |
| H | -2.72496600 | 1.83459300  | -0.01543600 |
| H | 0.14796500  | -1.25133000 | 0.68988600  |
| H | 1.07697400  | 0.02885900  | 2.59419600  |
| H | 0.10535100  | 2.22785500  | 3.20064300  |
| C | -1.89355500 | -0.54812100 | -0.96636600 |
| N | -1.02965400 | -0.32010900 | -2.21746900 |
| H | -0.67766600 | -1.16183700 | -2.66687200 |
| H | -1.86837300 | -1.62380200 | -0.74325500 |
| O | -3.06475600 | -0.09452600 | -1.50852300 |
| H | -2.13461800 | 0.04929900  | -2.50714300 |
| H | -0.28742100 | 0.36945700  | -2.12186500 |

---

## References

- [1] Y. Xiao; G. Tian; W. Li; Y. Xie; B. Jiang; C. Tian; D. Zhao; H. Fu. *J. Am. Chem. Soc.* **2019**, *141* (6), 2508-2515.
- [2] J. Zhang; X. Chen; K. Takanabe; K. Maeda; K. Domen; J. D. Epping; X. Fu; M. Antonietti; X. Wang. *Angewandte Chemie-International Edition* **2010**, *49* (2), 441-444.
- [3] X. Wang; C. Zhou; R. Shi; Q. Liu; G. I. N. Waterhouse; L. Wu; C.-H. Tung; T. Zhang. *Nano Res.* **2019**, *12* (9), 2385-2389.
- [4] Y.-S. Jun; E. Z. Lee; X. Wang; W. H. Hong; G. D. Stucky; A. Thomas. *Adv. Funct. Mater.* **2013**, *23* (29), 3661-3667.
- [5] W. Yu; T. Zhang; Z. Zhao. *Appl. Catal., B* **2020**, *278*, 119342.
- [6] X. Yu; Z. Zhao; J. Zhang; W. Guo; L. Li; H. Liu; Z. L. Wang. *CrystEngComm* **2017**, *19* (1), 129-136.
- [7] K. N. Ahmad; S. A. Anuar; W. N. R. Wan Isahak; M. I. Rosli; M. A. Yarmo. *ACS Appl. Mater. Interfaces* **2020**, *12* (6), 7102-7113.
- [8] *Gaussian 16 Rev. B. 01 (Wallingford, CT, 2016)*; Gaussian, Inc., Wallingford CT, 2016.: 2016. (accessed).
- [9] Y. Zhao; D. G. Truhlar. *Theor Chem Acc* **2008**, *120* (1-3), 215-241.
- [10] A. Castro-Alvarez; H. Cameros; D. Sánchez; J. Vilarrasa. *J Org Chem* **2015**, *80* (24), 11977-11985.
